# Supplementary material for: Effectiveness of lifestyle interventions for improving the physical health of children and adolescents taking antipsychotic medications: protocol for a systematic review and meta-analysis
Source: PubMed Central journal article supplement — BMJ Open. 2023 Oct 27;13(10):e073893. doi: 10.1136/bmjopen-2023-073893 (PMC10619077; doi:10.1136/bmjopen-2023-073893), 2023-10-27
Supplement: bmjopen-2023-073893.draft_revisions.pdf [file bmjopen-2023-073893.draft_revisions.pdf]

# BMJ Open

BMJ Open is committed to open peer review. As part of this commitment we make the peer review history of every article we publish publicly available.

When an article is published we post the peer reviewers' comments and the authors' responses online. We also post the versions of the paper that were used during peer review. These are the versions that the peer review comments apply to.

The versions of the paper that follow are the versions that were submitted during the peer review process. They are not the versions of record or the final published versions. They should not be cited or distributed as the published version of this manuscript.

BMJ Open is an open access journal and the full, final, typeset and author-corrected version of record of the manuscript is available on our site with no access controls, subscription charges or pay-per-view fees (<http://bmjopen.bmj.com>).

If you have any questions on BMJ Open's open peer review process please email [info.bmjopen@bmj.com](mailto:info.bmjopen@bmj.com)

# BMJ Open

## The Effectiveness of Lifestyle Interventions for Improving the Physical Health of Children and Adolescents Taking Antipsychotic Medications: Protocol for a Systematic Review and Meta-Analysis.

|                               |                                                                                                                                                                                                                                                                                                                                                                                                                                                                                                                                                                                                                                                                                                                                                               |
|-------------------------------|---------------------------------------------------------------------------------------------------------------------------------------------------------------------------------------------------------------------------------------------------------------------------------------------------------------------------------------------------------------------------------------------------------------------------------------------------------------------------------------------------------------------------------------------------------------------------------------------------------------------------------------------------------------------------------------------------------------------------------------------------------------|
| Journal:                      | <i>BMJ Open</i>                                                                                                                                                                                                                                                                                                                                                                                                                                                                                                                                                                                                                                                                                                                                               |
| Manuscript ID                 | bmjopen-2023-073893                                                                                                                                                                                                                                                                                                                                                                                                                                                                                                                                                                                                                                                                                                                                           |
| Article Type:                 | Protocol                                                                                                                                                                                                                                                                                                                                                                                                                                                                                                                                                                                                                                                                                                                                                      |
| Date Submitted by the Author: | 21-Mar-2023                                                                                                                                                                                                                                                                                                                                                                                                                                                                                                                                                                                                                                                                                                                                                   |
| Complete List of Authors:     | Hawker, Patrick; University of New South Wales<br>Bellamy, Jessica; University of Wollongong<br>McHugh, Catherine; University of New South Wales<br>Wong, Tsz Ying; University of New South Wales, Discipline of Psychiatry & Mental Health<br>Williams, Katrina; Monash University<br>Wood, Amanda; Murdoch Children's Research Institute<br>Anderson, Vicki; The Royal Children's Hospital Melbourne<br>Tonge, Bruce J.; Monash University<br>Ward, Philip ; University of New South Wales School of Psychiatry,<br>Sciberras, Emma; Deakin University<br>Bellgrove, Mark; Monash University<br>Silk, Tim; Deakin University<br>Eapen, Valsamma; South Western Sydney Local Health District, ICAMHS;<br>University of New South Wales, School of Psychiatry |
| Keywords:                     | Child & adolescent psychiatry < PSYCHIATRY, Adolescent, PSYCHIATRY, PAEDIATRICS                                                                                                                                                                                                                                                                                                                                                                                                                                                                                                                                                                                                                                                                               |
|                               |                                                                                                                                                                                                                                                                                                                                                                                                                                                                                                                                                                                                                                                                                                                                                               |

SCHOLARONE™  
Manuscripts

1  
2  
3  
4  
5  
6  
7  
8  
9  
10  
11  
12  
13  
14  
15  
16  
17  
18  
19  
20  
21  
22  
23  
24  
25  
26  
27  
28  
29  
30  
31  
32  
33  
34  
35  
36  
37  
38  
39  
40  
41  
42  
43  
44  
45  
46  
47  
48  
49  
50  
51  
52  
53  
54  
55  
56  
57  
58  
59  
60

## The Effectiveness of Lifestyle Interventions for Improving the Physical Health of Children and Adolescents Taking Antipsychotic Medications: Protocol for a Systematic Review and Meta-Analysis.

Patrick Hawker ([p.hawker@unsw.edu.au](mailto:p.hawker@unsw.edu.au)),<sup>1</sup> Jessica Bellamy ([jbellamy@uow.edu.au](mailto:jbellamy@uow.edu.au)),<sup>2</sup> Catherine McHugh ([c.mchugh@unsw.edu.au](mailto:c.mchugh@unsw.edu.au)),<sup>1</sup> Tsz Ying Wong ([tsz\\_ying.wong@unsw.edu.au](mailto:tsz_ying.wong@unsw.edu.au)),<sup>1</sup> Katrina Williams ([katrina.williams@monash.edu](mailto:katrina.williams@monash.edu)),<sup>4</sup> Amanda Wood ([amanda.wood@mcri.edu.au](mailto:amanda.wood@mcri.edu.au)),<sup>3</sup> Vicki Anderson ([vicki.anderson@rch.org.au](mailto:vicki.anderson@rch.org.au)),<sup>6</sup> Bruce Tonge ([bruce.tonge@monash.edu](mailto:bruce.tonge@monash.edu)),<sup>4</sup> Philip Ward ([p.ward@unsw.edu.au](mailto:p.ward@unsw.edu.au)),<sup>1</sup> Emma Sciberras ([emma.sciberras@deakin.edu.au](mailto:emma.sciberras@deakin.edu.au)),<sup>5</sup> Mark Bellgrove ([mark.bellgrove@monash.edu](mailto:mark.bellgrove@monash.edu)),<sup>4</sup> Tim Silk ([tim.silk@deakin.edu.au](mailto:tim.silk@deakin.edu.au)),<sup>5</sup> Valsamma Eapen ([v.eapen@unsw.edu.au](mailto:v.eapen@unsw.edu.au))<sup>1\*</sup>

<sup>1</sup> Discipline of Psychiatry & Mental Health, University of New South Wales, Sydney, NSW, Australia

<sup>2</sup> School of Medical, Indigenous and Health Sciences, Faculty of Science, Medicine & Health, University of Wollongong, Wollongong, NSW, Australia

<sup>3</sup> Murdoch Children's Research Institute (MCRI), Melbourne, VIC, Australia

<sup>4</sup> Monash University, Melbourne, VIC, Australia

<sup>5</sup> Deakin University, Melbourne, VIC, Australia

<sup>6</sup> The Royal Children's Hospital, Melbourne, VIC, Australia

### \*Corresponding Author and Review Guarantor

Professor Valsamma Eapen

Email: [v.eapen@unsw.edu.au](mailto:v.eapen@unsw.edu.au)

Mailing Address: Level 3, AGSM Building (G27), Gate 11, Botany St, UNSW Sydney Campus, Kensington NSW 2052

**Keywords:** Child; Adolescent; Antipsychotic Agents; Metabolic Syndrome; Weight Gain; Psychosocial Intervention.

**Word Count:** 2,679

## AMENDMENTS TO PROTOCOL

In the event of protocol amendments, the date of each amendment will be accompanied by a description of the change and the rationale, listed in Table 1.

**Table 1:** Amendments to the Systematic Review Protocol.

| Document Version | Amendment                                                                                                                                                                                                                                                                    | Rationale                                                                                                                                                                                                                                                             |
|------------------|------------------------------------------------------------------------------------------------------------------------------------------------------------------------------------------------------------------------------------------------------------------------------|-----------------------------------------------------------------------------------------------------------------------------------------------------------------------------------------------------------------------------------------------------------------------|
| 1.0              | N/A- First draft.                                                                                                                                                                                                                                                            | N/A- First draft.                                                                                                                                                                                                                                                     |
| 1.1              | <p><b>Amendment 1:</b> Modified inclusion/exclusion criteria. No longer including systematic reviews of RCTs.</p> <p><b>Amendment 2:</b> Modified dates (pushed back deadlines and key deliverable dates by 2 months).</p> <p><b>Amendment 3:</b> Modified search terms.</p> | <p>Amendment 1 made in line with comments from authors and advice received by UNSW academic librarians.</p> <p>Amendment 2 made in line with project delays.</p> <p>Amendment 3 made in line with feedback from authors and advice from UNSW academic librarians.</p> |
| 1.2              | <b>Amendment 1:</b> Updated section: Background and Rationale.                                                                                                                                                                                                               | Amendments implemented in line with feedback from KW.                                                                                                                                                                                                                 |
| 1.3              | <b>Amendment 1:</b> Proofing throughout.                                                                                                                                                                                                                                     | Amendments implemented in line with feedback from TYW.                                                                                                                                                                                                                |

## STUDY TIMELINE

**October 2022 - March 2023:** Preparation of protocol document & Prospero.

**March 2023 – September 2023:** Searches for published and unpublished studies (ongoing).

**November 2022 – March 2023:** Pilot test of eligibility criteria.

**December 2022 – September 2023:** Inclusion assessments and article screening.

1  
2  
3 **December 2022 – November 2023:** Data collection & data entry.  
4

5 **April 2023 – December 2023:** Follow-up missing information from papers.  
6

7  
8 **September 2023 – November 2023:** Data synthesis and analysis.  
9

10 **October 2022 – December 2023:** Preparation of manuscript.  
11

12  
13 **February 2024:** Submission to journal for peer review.  
14  
15  
16

## 17 **ABSTRACT**

18  
19  
20 **Introduction:** Children and adolescents are increasingly prescribed antipsychotic medications  
21 off-label in the treatment of behavioural disorders. While antipsychotic medications are  
22 effective in managing behavioural issues, they carry a significant risk of adverse events which  
23 compromises ongoing physical health. Of particular concern is the negative impact  
24 antipsychotic medications have on cardiometabolic health. Interventions which aim to modify  
25 lifestyle habits have the potential to alleviate the adverse effects of antipsychotic medication  
26 by enhancing weight management, increasing physical activity, promoting better nutritional  
27 practices, improving dietary habits, and promoting healthier sleep patterns and sleep hygiene.  
28 However, a comprehensive review has not been performed to ascertain the effectiveness of  
29 lifestyle interventions for children and adolescents who are at increased risk of antipsychotic-  
30 induced compromises to their physical health.  
31  
32  
33  
34  
35  
36  
37  
38  
39

40 **Methods and analysis:** This systematic review will follow the Preferred Reporting Items for  
41 Systematic Reviews and Meta-Analyses guidelines. Four databases will be searched without  
42 any year constraints, to identify randomised controlled trials which are published in the English  
43 language and report a lifestyle intervention compared to usual care with any physical health  
44 outcome measure. Trial registers and results repositories will be scoured to identify additional  
45 studies. Two reviewers will independently conduct screening, data extraction, and quality  
46 assessment, and compare results. Quantitative data will be synthesized, where appropriate,  
47 through a random-effects meta-analysis model. Otherwise, data will be reported in a qualitative  
48 (narrative) synthesis. Heterogeneity will be quantified using the  $I^2$  statistic. The Cochrane Risk  
49 of Bias 2 tool be used for risk of bias assessment. The Grading of Recommendations,  
50 Assessment, Development, and Evaluation system will be used to evaluate the cumulative body  
51 of evidence.  
52  
53  
54  
55  
56  
57  
58  
59  
60

**Ethics and Dissemination:** Ethics approval not required. Publication plan will target high-impact, peer reviewed journals which fall under the scope of Psychiatry & Mental Health.

**Trial Registration:** Registered with PROSPERO (CRD42022380277).

## ARTICLE SUMMARY

### STRENGTHS AND LIMITATIONS OF THIS STUDY

- By combining data from multiple studies, this systematic review is expected to provide greater statistical power to detect differences between intervention and control groups than individual studies alone.
- By analysing the existing evidence base on lifestyle interventions, this systematic review can identify gaps where further research is needed to address unanswered questions or resolve conflicting findings.
- A potentially limiting factor of this study is the heterogeneity of lifestyle interventions, which could hinder the ability to reach definitive conclusions about their effectiveness.
- A potential limitation of this study is that the quality of included studies may vary significantly, potentially impacting the robustness of the findings.

### INTRODUCTION

While antipsychotic medications are efficacious in treating a range of complex psychiatric disorders, the utility of these drugs is hampered by their tendency to elicit a range of adverse effects which compromises ongoing health.<sup>1</sup> Interventions which aim to modify lifestyle habits have the potential to alleviate the adverse effects of antipsychotic medication by enhancing weight management, increasing physical activity, promoting better nutritional practices, improving dietary habits, and promoting healthier sleep patterns and sleep hygiene.<sup>2</sup> The effectiveness of lifestyle interventions for reducing weight gain has been comprehensively studied in adult populations with serious mental illness (SMI) who take antipsychotic medications.<sup>2-5</sup> Adults with SMI are at increased risk of weight gain due to a combination of factors related to impaired functioning and motivation, but particularly due to antipsychotic treatment initiation.<sup>6</sup> During intervention periods, different components of lifestyle

1  
2  
3 interventions can improve anthropometric measures (weight, body mass index (BMI), and  
4 waist circumference), reduce diastolic blood pressure, pressure, reduce blood sugar, improve  
5 physical fitness, and improve dietary habits for adults with SMI.<sup>2-5,7</sup> However, a comprehensive  
6 evaluation of lifestyle interventions for children and adolescents who take antipsychotic  
7 medications is lacking.  
8  
9

10  
11  
12 Select antipsychotic medications are approved to treat child psychiatric disorders including  
13 childhood schizophrenia and bipolar mania,<sup>8</sup> Tourette's Syndrome,<sup>9</sup> and aggression and  
14 irritability in children with autism spectrum disorder (ASD).<sup>10,11</sup> Antipsychotic medications are  
15 also prescribed off-label to children and adolescents, including those with neurodevelopmental  
16 disorders, to manage disruptive behaviour resistant to other forms of treatment.<sup>1,12</sup> In fact, the  
17 most common use of antipsychotic medications in paediatrics is to treat disruptive behaviours  
18 and not psychotic disorders.<sup>13</sup>  
19  
20  
21  
22  
23  
24

25 While there is some evidence that short term antipsychotic use may reduce aggression and  
26 conduct problems in children and adolescents with disruptive behaviour disorders,<sup>12,14-17</sup>  
27 antipsychotic medications carry a significant risk of adverse events which compromise ongoing  
28 health.<sup>1,12,18</sup> These adverse events include metabolic disturbances, sedation/somnolence,  
29 prolactin elevation, sexual dysfunction, cardiological and haematological adverse events,  
30 neurological adverse events, and even behavioural adverse events, including psychomotor  
31 retardation, anorexia, agitation, or lack of spontaneity.<sup>1,18</sup> Cardiometabolic disturbances are  
32 the most clinically significant in this population, due to the propensity for continued  
33 complications in adulthood and long-term morbidity costs.<sup>19</sup> Common cardiometabolic  
34 complications from antipsychotic medication use includes weight gain, dyslipidaemia, elevated  
35 blood pressure, and increased risk of type-2 diabetes.<sup>20-22</sup> There is increasing evidence to  
36 suggest that compared to adults, children and adolescents are more susceptible to developing  
37 cardiometabolic complications from antipsychotic use,<sup>1,23-27</sup> particularly children with  
38 ASD.<sup>23,28</sup> Antipsychotic prescription to children and adolescents is increasing  
39 internationally.<sup>29-32</sup>  
40  
41  
42  
43  
44  
45  
46  
47  
48  
49  
50

51 Given that most lifestyle interventions targeting the physical health impact of antipsychotics  
52 have been conducted in adults with SMI, the effectiveness of these interventions in children  
53 and adolescents taking antipsychotics is unknown. Children and adolescents represent a unique  
54 cohort due to their relatively early stage of development which promotes susceptibility to the  
55 adverse cardiometabolic effects of antipsychotics.<sup>1,23-27</sup> Due to recurrent disruptive behaviour,  
56  
57  
58  
59  
60

1  
2  
3 children and adolescents who are started on psychotropic medicines tend to continue taking  
4 them for prolonged periods.<sup>33</sup> While several guidelines exist recommending psychological and  
5 environmental interventions as the first-line treatment for disruptive behaviours (e.g., UK  
6 NICE guidelines, Frith Prescribing Guidelines, STOMP), their implementation in practice is  
7 inadequate.<sup>33-35</sup> Hence, early lifestyle interventions targeted at children and adolescents  
8 prescribed antipsychotics have the opportunity to mitigate poor physical health outcomes  
9 during critical health periods and reduce the translation to overweight, obesity, and other  
10 cardiometabolic risk factors to adulthood. By reducing the negative effects of antipsychotic  
11 medications, it may be possible to sustain their usage, leading to the optimization of critical  
12 learning and developmental periods.  
13  
14  
15  
16  
17  
18  
19  
20  
21  
22

## 23 OBJECTIVES

24  
25  
26 The purpose of this systematic review is to evaluate the effectiveness of lifestyle interventions  
27 for improving the physical health of children and adolescents (aged 6 to 17 years) who are  
28 taking antipsychotic medications. Specifically, the proposed study will aim to answer the  
29 following research questions:  
30  
31  
32  
33  
34  
35

- 36 1. *For children and adolescents taking antipsychotic medications, do lifestyle*  
37 *interventions reduce the risk of compromised physical health (see Table 2 for the list of*  
38 *physical health outcome measures) compared to treatment as usual (i.e., participants*  
39 *who receive standard medical care services but no specific intervention for lifestyle*  
40 *support)?*  
41  
42  
43  
44
- 45 2. *Which individual or combined components of a lifestyle intervention are the most*  
46 *effective in reducing the risk of physical health decline?*  
47  
48  
49  
50

## 51 Primary Outcome Measure

52  
53 While all relevant physical health outcomes will be considered (see Table 2), the primary  
54 outcome measure will be the difference in body mass index (BMI) between control and  
55 intervention groups. BMI was selected as the primary outcome measure as it is the most  
56 robust indicator to identify individuals whose excess adiposity puts them at increased  
57  
58  
59  
60

cardiometabolic risk.<sup>36</sup> Where other measures of physical health are reported, they will be included (see Table 2).

## METHODS AND ANALYSIS

This systematic review protocol was developed with the PRISMA-P reporting guidelines (see Appendix 2).<sup>37</sup>

### ELIGIBILITY CRITERIA

The eligibility criteria are described in Table 2, below.

**Table 2:** Eligibility criteria organised in accordance with the population, interventions, comparisons, outcomes, setting, and study design (PICOS) reporting structure.

|                      |                                                                                                                                                                                                                                                                                                                                                                                                                                                                             |
|----------------------|-----------------------------------------------------------------------------------------------------------------------------------------------------------------------------------------------------------------------------------------------------------------------------------------------------------------------------------------------------------------------------------------------------------------------------------------------------------------------------|
| <b>Population</b>    | Youth aged 6 to 17 years who are taking antipsychotic medications. Youth most likely to be taking antipsychotic medications include those diagnosed with a neurodevelopmental disorder (i.e., ID, ASD, ADHD, TS) and comorbid disruptive behaviour disorder/behavioural issues, or youth with first-episode psychosis, childhood schizophrenia or bipolar mania. Study will be eligible for inclusion if $\geq 70\%$ of the sample is taking antipsychotic medications.     |
| <b>Interventions</b> | All interventions which incorporate a 'lifestyle' intervention component and aim to improve physical health outcomes will be eligible. This includes any educational, psychotherapeutic, social, and behavioural intervention which aims to increase exercise or physical activity, optimise dietary intake, aid smoking cessation, or improve sleep quality and duration.                                                                                                  |
| <b>Comparisons</b>   | All relevant control interventions will be included (i.e., treatment as usual/usual care, placebo, no treatment, waiting list).                                                                                                                                                                                                                                                                                                                                             |
| <b>Outcomes</b>      | Physical health outcomes which will be <b>included</b> : <ol style="list-style-type: none"> <li>1) Anthropometric measures, including weight, height, waist circumference, or BMI percentile.</li> <li>2) Blood pressure.</li> <li>3) Metabolic or biological markers, including glucose and lipid levels, haemoglobin A1c (HbA1c), C-reactive protein or other relevant blood and serum markers.</li> <li>4) Presence of cardiovascular or respiratory disease.</li> </ol> |

- 
- 5) Physical health behaviour, including physical activity levels, smoking behaviour, dietary intake, sleep quality and duration, engagement in treatment and attendance.
  - 6) Indicators of physical fitness, including aerobic capacity (i.e., VO<sub>2</sub> Max), and muscle strength.
  - 7) Physical health-related quality of life.
  - 8) Side effects of antipsychotics, including adverse drug reactions.

Physical health outcomes which will be **excluded**:

- 1) Motor development.

---

|                                           |                                                                                                                                                                                                                                                                                                                                                                                                                                     |
|-------------------------------------------|-------------------------------------------------------------------------------------------------------------------------------------------------------------------------------------------------------------------------------------------------------------------------------------------------------------------------------------------------------------------------------------------------------------------------------------|
| <b>Setting</b>                            | All settings will be included: primary and secondary care, hospital (inpatient or outpatient), community and school-based service provisions, or remote (digital application-based or telehealth/web health services).                                                                                                                                                                                                              |
| <b>Study Design &amp; Characteristics</b> | Applicable RCTs published in the English language will be included. All years will be considered, and no date restrictions will be applied. Pseudorandomised control trials, comparative studies with concurrent controls, case series and cohort studies will be excluded. Conference abstracts, dissertations/theses, papers which are not peer-reviewed, and papers published in a language other than English will be excluded. |

---

## INFORMATION SOURCES

The literature search will be executed using MeSH terms and keywords related to lifestyle interventions in the population under investigation (as outlined in Table 2). Four databases, including MEDLINE (via PubMed), EMBASE (via Ovid), the Cochrane Central Register of Controlled Trials (CENTRAL), and PsycINFO, will be searched without any year constraints. The results will be restricted to studies published in English and employing a randomized controlled trial (RCT) design. The search process will be guided by the Cochrane Handbook for Systematic Reviews to determine the most appropriate RCT design filter for each database. To ensure literature saturation, the reference lists of included studies will be scanned to identify additional relevant articles. Google Scholar's 'cited by' function will be used to search for relevant articles which cite the included studies. Trial registers and results repositories will be scoured, including ClinicalTrials.gov and the World Health Organisation (WHO) International Clinical Trials Registry Platform (ICTRP) portal, in accordance with the Cochrane guidelines.<sup>38</sup> To account for the emergence of new studies published in the period after initial searches were performed, searches will be re-run before final data analysis.

## SEARCH STRATEGY

The development of the search strategies for each database will be conducted with the oversight of a Medicine & Health academic librarian who possesses expertise in systematic review searching. The project team will contribute to the development of the strategies, which will be peer-reviewed by the academic librarian. The draft strategy for MEDLINE is presented in Appendix 1. After finalising the MEDLINE strategy, it will be adapted to the syntax and MeSH terms/subject headings of the other databases. The validity of the search strategies will be evaluated to ensure a high yield of eligible studies from all relevant databases.

## STUDY RECORDS

Literature search results from electronic databases will be uploaded to Covidence software for systematic reviews.<sup>39</sup> Two reviewers will independently screen the title and abstract of each study to determine eligibility. The full text of eligible studies will be obtained and screened against the inclusion criteria. The data from the included studies will be extracted and entered into Covidence by two independent reviewers. Duplicate entries will be removed and discrepancies between the two reviewers' data will be resolved through discussion and consensus. Any unresolved conflicts between the two primary reviewers will be settled by a third reviewer. The data will be regularly backed up to ensure data integrity and to prevent loss of information. Access to the data will be restricted to authorized personnel and will be protected by secure passwords. The data collected for the systematic review will be retained for a minimum of 5 years after publication of the review, as per UNSW's recommended retention periods for research data and records. Upon finalization of results, the data will be securely uploaded to a suitable repository.

## DATA ITEMS AND OUTOMES

All outcomes which relate to physical health will be extracted for analysis, including the following: (1) Anthropometric measures, including weight, height, waist circumference, or BMI percentile; (2) Blood pressure; (3) Indicators of physical fitness, including aerobic capacity (i.e., VO2 Max), and muscle strength; (4) Metabolic or biological markers, including glucose and lipid levels, proportion with abnormal glucose or lipid parameters, haemoglobin A1c (HbA1c), C-reactive protein or other relevant blood and serum markers; (5) Presence of

1  
2  
3 cardiovascular illness, including myocardial infarction, stroke, transient ischemic attack, and  
4 pulmonary embolism; (6) Presence of respiratory illness, including lung cancer and chronic  
5 obstructive pulmonary disease (COPD); (7) Physical health behaviour, including physical  
6 activity levels, smoking behaviour, dietary intake, sleep habits, and appointment attendance;  
7 (8) Physical health-related quality of life; and (9) Side effects, including adverse drug reactions.  
8  
9  
10  
11  
12  
13  
14

### 15 **Missing Data**

16  
17 To ensure that all relevant data is included in the meta-analysis, authors of included studies  
18 will be contacted to request any missing data. For initial contact, a polite and respectful email  
19 will be sent to the corresponding author of each study, introducing the meta-analysis and the  
20 purpose of the request for missing data. If there is no response to the initial email, a follow-up  
21 email or phone call will be made after two weeks. If there is still no response after the follow-  
22 up, a final reminder will be sent after one week, highlighting the importance of the missing  
23 data and its impact on the meta-analysis results. All attempts to contact the investigators and  
24 the responses received will be documented in the meta-analysis study protocol.  
25  
26  
27  
28  
29  
30  
31  
32  
33

### 34 **RISK OF BIAS ASSESSMENT**

35  
36 The risk of bias will be assessed using the Cochrane Risk of Bias Tool for RCTs (RoB 2)<sup>40</sup>.  
37 Rob 2 assesses bias in five domains, which each incorporate one or more signalling questions  
38 that leads to judgements of “low risk of bias”, “some concerns,” or “high risk of bias”. These  
39 judgements lead to an overall risk-of-bias judgement for the included studies, enabling users  
40 to stratify meta-analyses bias according to the risk of bias of individual studies.<sup>40</sup> To ensure  
41 rigour, two reviewers will independently perform quality assessment and compare results. A  
42 third reviewer will be available to settle any disagreement between the two reviewers.  
43  
44  
45  
46  
47  
48  
49  
50

### 51 **DATA**

### 52 **SYNTHESIS**

53  
54  
55  
56 Data on relevant outcome measures will be extracted from articles using a standardised data  
57 extraction form. Quantitative data will be synthesized, where appropriate, through a random-  
58 effects meta-analysis model. Effect size data will be extracted with 95% confidence intervals  
59  
60

(CI) for relevant outcomes, in addition to the number of participants ( $n$ ) in the lifestyle intervention or control group for each effect size. Where not possible to extract effect size data for the meta-analysis, data will be reported in a qualitative (narrative) synthesis. Effect size data with 95% CI for relevant outcomes will be recalculated as a standardised mean difference (SMD), to express the mean difference between groups in standard deviation ( $SD$ ) units with a 95% CI. SMDs of less than 0.2 will be considered negligible, SMD between 0.2 and  $< 0.5$  small, SMD between 0.5 and  $< 0.8$  medium, and SMD  $\geq 0.8$  large.<sup>41</sup> Risk ratios (RRs) will be used for categorical outcomes. Odds ratios will be recalculated as RRs. Heterogeneity will be quantified using the  $I^2$  statistic, with scores of  $< 25\%$ , 25-50% and  $> 50\%$  indicating low, moderate, and high heterogeneity, respectively. Forest plots will be generated to show SMD with CIs for each study and the overall random pooled effects estimate. Analyses will be performed using R statistical analysis software.<sup>42</sup>

### Subgroup Analysis

To explore potential sources of variability in the data, subgroup analyses will be conducted based on the following variables:

1. Patient demographics (age, gender, and diagnosis) will be considered, and categorical or meta-regression analysis will be employed to examine the relationship between mean age and SMD for continuous variables.
2. Type of antipsychotic medication.
3. Duration of lifestyle intervention treatment.
4. Length of follow-up period (3, 6, and 12 months).

### Sensitivity Analysis

Sensitivity analyses will be conducted to assess the robustness of the results and to identify any sources of heterogeneity in the data. This will be performed by excluding studies with a high risk of bias, as well as by excluding studies with specific characteristics (e.g., short follow-up period, small sample size, etc.).

## META-BIAS(ES)

The systematic review will include an assessment of meta-bias to ensure the validity of the results. As described, to ensure a robust assessment of individual RCTs, the review team will utilize the Cochrane RoB 2 tool.<sup>40</sup> Sensitivity analysis will allow assessment of the robustness of results and identification of any sources of heterogeneity in the data.

### **Additional Assessments of Meta-Bias**

The evaluation of outcome reporting bias within the included studies will be conducted through a comparison of the reported data to the data outlined in the original study protocol or registry, if available. This will promote transparency in the reporting of all relevant data. Funnel plot analysis will be performed to assess the presence of publication bias. The funnel plot will be created using the standard error of each study's effect size, and the symmetry of the plot will be visually inspected to assess the presence of publication bias. Additionally, formal tests of funnel plot asymmetry, such as Egger's regression test or the Begg's test, will be performed to provide a statistical evaluation of funnel plot asymmetry. The results of the analysis will provide an indication of the likelihood of publication bias and inform the interpretation of the overall results of the meta-analysis. In addition, the results of this systematic review will be compared with other relevant systematic reviews to ensure that the findings are in line with previous research. Any discrepancies will be investigated to identify any potential sources of meta-bias.

### **Confidence in Cumulative Evidence**

The present systematic review and meta-analysis will utilize the GRADE (Grading of Recommendations, Assessment, Development, and Evaluation) system<sup>43</sup> for assessing the strength of the body of evidence. The GRADE system offers a transparent and standardized method for evaluating the strength of the evidence, providing a basis for informed decision making. The quality of evidence will be classified into one of four levels- high, moderate, low, or very low- based on the anticipated impact of further research on the confidence in the estimate of effect. GRADE will be applied to three anthropometric assessments of cardiometabolic health (BMI, waist circumference, and blood pressure). The GRADE system

is widely recognized as a credible and validated approach in systematic reviews and meta-analyses, with extensive validation and usage in the field.<sup>43</sup>

## REFERENCES

- 1 Iasevoli, F., Barone, A., Buonaguro, E. F., Vellucci, L. & de Bartolomeis, A. Safety and tolerability of antipsychotic agents in neurodevelopmental disorders: a systematic review. *Expert Opin Drug Saf* **19**, 1419-1444, doi:10.1080/14740338.2020.1820985 (2020).
- 2 Naslund, J. A. *et al.* Lifestyle interventions for weight loss among overweight and obese adults with serious mental illness: A systematic review and meta-analysis. *General Hospital Psychiatry* **47**, 83-102, doi:<https://doi.org/10.1016/j.genhosppsych.2017.04.003> (2017).
- 3 Vancampfort, D. *et al.* The impact of pharmacological and non-pharmacological interventions to improve physical health outcomes in people with schizophrenia: a meta-review of meta-analyses of randomized controlled trials. *World Psychiatry* **18**, 53-66, doi:<https://doi.org/10.1002/wps.20614> (2019).
- 4 Speyer, H. *et al.* Lifestyle Interventions for Weight Management in People with Serious Mental Illness: A Systematic Review with Meta-Analysis, Trial Sequential Analysis, and Meta-Regression Analysis Exploring the Mediators and Moderators of Treatment Effects. *Psychother Psychosom* **88**, 350-362, doi:10.1159/000502293 (2019).
- 5 Bradley, T. *et al.* Systematic review of lifestyle interventions to improve weight, physical activity and diet among people with a mental health condition. *Systematic Reviews* **11**, 198, doi:10.1186/s13643-022-02067-3 (2022).
- 6 Dayabandara, M. *et al.* Antipsychotic-associated weight gain: management strategies and impact on treatment adherence. *Neuropsychiatr Dis Treat* **13**, 2231-2241, doi:10.2147/ndt.S113099 (2017).
- 7 Gates, J., Killackey, E., Phillips, L. & Álvarez-Jiménez, M. Mental health starts with physical health: current status and future directions of non-pharmacological interventions to improve physical health in first-episode psychosis. *The Lancet Psychiatry* **2**, 726-742, doi:[https://doi.org/10.1016/S2215-0366\(15\)00213-8](https://doi.org/10.1016/S2215-0366(15)00213-8) (2015).
- 8 Fraguas, D. *et al.* Efficacy and safety of second-generation antipsychotics in children and adolescents with psychotic and bipolar spectrum disorders: Comprehensive review of prospective head-to-head and placebo-controlled comparisons. *European Neuropsychopharmacology* **21**, 621-645, doi:<https://doi.org/10.1016/j.euroneuro.2010.07.002> (2011).
- 9 Huys, D. *et al.* Update on the role of antipsychotics in the treatment of Tourette syndrome. *Neuropsychiatr Dis Treat* **8**, 95-104, doi:10.2147/ndt.S12990 (2012).
- 10 Jensen, P. S. *et al.* Consensus Report on Impulsive Aggression as a Symptom Across Diagnostic Categories in Child Psychiatry: Implications for Medication Studies. *Journal of the American Academy of Child & Adolescent Psychiatry* **46**, 309-322, doi:<https://doi.org/10.1097/chi.0b013e31802f1454> (2007).
- 11 McDougle, C. J., Stigler, K. A., Erickson, C. A. & Posey, D. J. Atypical antipsychotics in children and adolescents with autistic and other pervasive developmental disorders. *Journal of Clinical Psychiatry* **69**, 15 (2008).

- 1  
2  
3 12 Loy, J. H., Merry, S. N., Hetrick, S. E. & Stasiak, K. Atypical antipsychotics for  
4 disruptive behaviour disorders in children and youths. *Cochrane Database Syst Rev* **8**,  
5 Cd008559, doi:10.1002/14651858.CD008559.pub3 (2017).  
6  
7 13 Penfold, R. B. *et al.* Use of antipsychotic medications in pediatric populations: what do  
8 the data say? *Curr Psychiatry Rep* **15**, 426, doi:10.1007/s11920-013-0426-8 (2013).  
9  
10 14 Fung, L. K. *et al.* Pharmacologic Treatment of Severe Irritability and Problem  
11 Behaviors in Autism: A Systematic Review and Meta-analysis. *Pediatrics* **137 Suppl**  
12 **2**, S124-135, doi:10.1542/peds.2015-2851K (2016).  
13  
14 15 Breaux, R. *et al.* A Mini-Review of Pharmacological and Psychosocial Interventions  
15 for Reducing Irritability Among Youth With ADHD. *Frontiers in Psychiatry* **13** (2022).  
16  
17 16 McQuire, C., Hassiotis, A., Harrison, B. & Pilling, S. Pharmacological interventions  
18 for challenging behaviour in children with intellectual disabilities: a systematic review  
19 and meta-analysis. *BMC Psychiatry* **15**, 303, doi:10.1186/s12888-015-0688-2 (2015).  
20  
21 17 Fallah, M. S. *et al.* Atypical Antipsychotics for Irritability in Pediatric Autism: A  
22 Systematic Review and Network Meta-Analysis. *J Child Adolesc Psychopharmacol* **29**,  
23 168-180, doi:10.1089/cap.2018.0115 (2019).  
24  
25 18 Cheng-Shannon, J., McGough, J. J., Pataki, C. & McCracken, J. T. Second-generation  
26 antipsychotic medications in children and adolescents. *J Child Adolesc*  
27 *Psychopharmacol* **14**, 372-394, doi:10.1089/cap.2004.14.372 (2004).  
28  
29 19 Simmonds, M., Llewellyn, A., Owen, C. G. & Woolacott, N. Predicting adult obesity  
30 from childhood obesity: a systematic review and meta-analysis. *Obes Rev* **17**, 95-107,  
31 doi:10.1111/obr.12334 (2016).  
32  
33 20 Pisano, S. *et al.* Update on the safety of second generation antipsychotics in youths: a  
34 call for collaboration among paediatricians and child psychiatrists. *Ital J Pediatr* **42**,  
35 51, doi:10.1186/s13052-016-0259-2 (2016).  
36  
37 21 Eapen, V. Evaluation of Weight Gain and Metabolic Parameters among Adolescent  
38 Psychiatric Inpatients: Role of Health Promotion and Life Style Intervention Programs.  
39 *Journal of Metabolic Syndrome* **01**, doi:10.4172/2167-0943.1000109 (2012).  
40  
41 22 Eapen, V., Shiers, D. & Curtis, J. Bridging the gap from evidence to policy and practice:  
42 reducing the progression to metabolic syndrome for children and adolescents on  
43 antipsychotic medication. *Aust N Z J Psychiatry* **47**, 435-442,  
44 doi:10.1177/0004867412463169 (2013).  
45  
46 23 De Hert, M., Dobbelaere, M., Sheridan, E. M., Cohen, D. & Correll, C. U. Metabolic  
47 and endocrine adverse effects of second-generation antipsychotics in children and  
48 adolescents: A systematic review of randomized, placebo controlled trials and  
49 guidelines for clinical practice. *Eur Psychiatry* **26**, 144-158,  
50 doi:10.1016/j.eurpsy.2010.09.011 (2011).  
51  
52 24 Correll, C. U. Assessing and maximizing the safety and tolerability of antipsychotics  
53 used in the treatment of children and adolescents. *J Clin Psychiatry* **69 Suppl 4**, 26-36  
54 (2008).  
55  
56 25 Stigler, K. A., Potenza, M. N., Posey, D. J. & McDougale, C. J. Weight gain associated  
57 with atypical antipsychotic use in children and adolescents: prevalence, clinical  
58 relevance, and management. *Paediatr Drugs* **6**, 33-44, doi:10.2165/00148581-  
59 200406010-00003 (2004).  
60  
61 26 Brown, J. T., Campo-Soria, C. & Bishop, J. R. Current strategies for predicting side  
62 effects from second generation antipsychotics in youth. *Expert Opinion on Drug*  
63 *Metabolism & Toxicology* **17**, 655-664, doi:10.1080/17425255.2021.1922668 (2021).  
64  
65 27 Ratzoni, G. *et al.* Weight gain associated with olanzapine and risperidone in adolescent  
66 patients: a comparative prospective study. *J Am Acad Child Adolesc Psychiatry* **41**,  
67 337-343, doi:10.1097/00004583-200203000-00014 (2002).

- 1  
2  
3 28 Busner, J. & Targum, S. D. The clinical global impressions scale: applying a research  
4 tool in clinical practice. *Psychiatry (Edgmont)* **4**, 28-37 (2007).
- 5 29 Karanges, E. A., Stephenson, C. P. & McGregor, I. S. Longitudinal trends in the  
6 dispensing of psychotropic medications in Australia from 2009–2012: Focus on  
7 children, adolescents and prescriber specialty. *Australian & New Zealand Journal of*  
8 *Psychiatry* **48**, 917-931 (2014).
- 9 30 Zito, J. M. *et al.* A three-country comparison of psychotropic medication prevalence in  
10 youth. *Child and Adolescent Psychiatry and Mental Health* **2**, 1-8 (2008).
- 11 31 Alessi-Severini, S., Biscontri, R. G., Collins, D. M., Sareen, J. & Enns, M. W. Ten years  
12 of antipsychotic prescribing to children: a Canadian population-based study. *The*  
13 *Canadian Journal of Psychiatry* **57**, 52-58 (2012).
- 14 32 Kagueidou, F. *et al.* 'Use of antipsychotics in children and adolescents: a picture from  
15 the ARITMO population-based European cohort study'. *Epidemiology and Psychiatric*  
16 *Sciences* **29**, e117, doi:10.1017/S2045796020000293 (2020).
- 17 33 Matson, J. L. & Neal, D. Psychotropic medication use for challenging behaviors in  
18 persons with intellectual disabilities: An overview. *Research in Developmental*  
19 *Disabilities* **30**, 572-586, doi:<https://doi.org/10.1016/j.ridd.2008.08.007> (2009).
- 20 34 Branford, D., Gerrard, D., Saleem, N., Shaw, C. & Webster, A. Stopping over-  
21 medication of people with intellectual disability, autism or both (STOMP) in England  
22 part 1—history and background of STOMP. *Advances in Mental Health and Intellectual*  
23 *Disabilities* **13**, 31-40 (2018).
- 24 35 National Collaborating Centre for Mental, H. Challenging behaviour and learning  
25 disabilities: prevention and interventions for people with learning disabilities whose  
26 behaviour challenges. (2015).
- 27 36 Abbasi, F., Blasey, C. & Reaven, G. M. Cardiometabolic risk factors and obesity: does  
28 it matter whether BMI or waist circumference is the index of obesity? *Am J Clin Nutr*  
29 **98**, 637-640, doi:10.3945/ajcn.112.047506 (2013).
- 30 37 Moher, D. *et al.* Preferred reporting items for systematic review and meta-analysis  
31 protocols (PRISMA-P) 2015 statement. *Systematic Reviews* **4**, 1, doi:10.1186/2046-  
32 4053-4-1 (2015).
- 33 38 Higgins, J. P. *et al.* *Cochrane handbook for systematic reviews of interventions*. (John  
34 Wiley & Sons, 2019).
- 35 39 *Covidence systematic review software*, <[www.covidence.org](http://www.covidence.org)> (  
36 Sterne, J. A. C. *et al.* RoB 2: a revised tool for assessing risk of bias in randomised  
37 trials. *BMJ* **366**, l4898, doi:10.1136/bmj.l4898 (2019).
- 38 41 Andrade, C. Mean Difference, Standardized Mean Difference (SMD), and Their Use in  
39 Meta-Analysis: As Simple as It Gets. *J Clin Psychiatry* **81**, doi:10.4088/JCP.20f13681  
40 (2020).
- 41 42 Team, R. C. *A language and environment for statistical computing*. *R Foundation for*  
42 *Statistical Computing*, <<https://www.R-project.org/>> (2021).
- 43 43 Guyatt, G. H. *et al.* GRADE: an emerging consensus on rating quality of evidence and  
44 strength of recommendations. *BMJ* **336**, 924-926, doi:10.1136/bmj.39489.470347.AD  
45 (2008).
- 46  
47  
48  
49  
50  
51  
52  
53  
54  
55  
56  
57  
58  
59  
60

## **AUTHORS' CONTRIBUTIONS**

PH conceptualised and designed the systematic review with input from JB, CM, TYW, KW, AW, VA, , BT, PW, ES, MB, TS, and VE. CM, VE, and PW supervised the project.

## **ACKNOWLEDGEMENTS**

We express our gratitude to Samantha Bowen (UNSW), for her valuable review and insightful evaluation of our search strategy. We also extend our appreciation to Nancy Briggs (UNSW) for her thorough examination and constructive input on our data synthesis approach.

## **FUNDING**

This systematic review is funded by Growing Minds Australia via the National Health and Medical Research Council (NHMRC; Grant ID: MRF2006438 (2020 MRFF Million Minds Mission) and sponsored by the University of New South Wales (UNSW), Sydney. The funding source (NHMRC Million Minds Mission) has no role in the design of this study and will not have any role during its execution, analyses, interpretation of the data, or decision to submit results.

## **COMPETING INTERESTS STATEMENT**

Authors have no competing interests to declare.

**Appendix 1:** Example Search Strategy for MEDLINE (via PubMed).

| Concept                                                                                            | Search Strategy                                                                                                                                                                                                                                                                                                                                                                                                                                                                                                                                                                                   | Actions      |
|----------------------------------------------------------------------------------------------------|---------------------------------------------------------------------------------------------------------------------------------------------------------------------------------------------------------------------------------------------------------------------------------------------------------------------------------------------------------------------------------------------------------------------------------------------------------------------------------------------------------------------------------------------------------------------------------------------------|--------------|
| Children and adolescents                                                                           | "Child"[MeSH Terms] OR<br>"Adolescent"[MeSH Terms] OR<br>"youth"[Text Word] OR<br>"infant"[Text Word] OR<br>"juvenile"[Text Word] OR<br>"minor"[Text Word] OR "young<br>person"[Text Word] OR<br>"youngster"[Text Word] OR<br>"kid"[Text Word] OR "kids"[Text<br>Word] OR "child*"[Text Word]<br>OR "adolesc*"[Text Word] OR<br>"teen*"[Text Word]                                                                                                                                                                                                                                                | Add          |
| Population (diagnosis of mental health illness likely to be prescribed antipsychotic medications). | "Neurodevelopmental<br>Disorders"[MeSH Terms:noexp]<br>OR "Attention Deficit Disorder<br>with Hyperactivity"[MeSH<br>Terms] OR "Developmental<br>Disabilities"[MeSH Terms] OR<br>"Intellectual Disability"[MeSH<br>Terms:noexp] OR "intellectual<br>disabilit*"[Text Word] OR<br>"intellectual impairment*"[Text<br>Word] OR "intellectual<br>delay*"[Text Word] OR "learning<br>disabilit*"[Text Word] OR<br>"learning impairment*"[Text<br>Word] OR "learning delay*"[Text<br>Word] OR "developmental<br>disabilit*"[Text Word] OR<br>"developmental delay"[Text<br>Word] OR "Child Development | Add with AND |

|                                                                   |                                                                                                                                                                                                                                                                                                                                                                                                                                                                                                                                                                                                                                                                                                                                                       |                     |
|-------------------------------------------------------------------|-------------------------------------------------------------------------------------------------------------------------------------------------------------------------------------------------------------------------------------------------------------------------------------------------------------------------------------------------------------------------------------------------------------------------------------------------------------------------------------------------------------------------------------------------------------------------------------------------------------------------------------------------------------------------------------------------------------------------------------------------------|---------------------|
|                                                                   | <p>Disorders, Pervasive"[Mesh] OR<br/> "schizophrenia, childhood"[MeSH<br/> Terms] OR "Tic<br/> Disorders"[MeSH Terms] OR<br/> "autism*"[Text Word] OR<br/> "autistic*"[Text Word] OR<br/> "Kanner's Syndrome"[Text Word]<br/> OR "neurodevelopmental*"[Text<br/> Word] OR "ADHD"[Text Word]<br/> OR "attention defici*"[Text<br/> Word] OR "pervasive<br/> developmental disorder"[Text<br/> Word] OR "developmental<br/> disabilit*"[Text Word] OR<br/> "intellectual disabilit*"[Text<br/> Word] OR "schizophrenia"[Text<br/> Word] OR "psychosis"[Text<br/> Word] OR "tourette*"[Text Word]<br/> OR "tic disorder"[Text Word] OR<br/> "asperger*"[Text Word] OR<br/> "Bipolar and Related<br/> Disorders"[Mesh] OR<br/> "bipolar*"[Text Word]</p> |                     |
| <p>Population (people taking<br/> antipsychotic medications).</p> | <p>"antipsychotic*"[Text Word] OR<br/> "Antipsychotic Agents"[MeSH<br/> Terms] OR "second generation<br/> antipsychotic*"[Text Word]</p>                                                                                                                                                                                                                                                                                                                                                                                                                                                                                                                                                                                                              | <p>Add with OR</p>  |
| <p>Lifestyle intervention (general)</p>                           | <p>"life style"[Text Word] OR<br/> "lifestyle*"[Text Word] OR "non<br/> pharmacologic*"[Text Word] OR<br/> "self management"[Text Word]<br/> OR "Patient Education as<br/> Topic"[MeSH Terms:noexp] OR</p>                                                                                                                                                                                                                                                                                                                                                                                                                                                                                                                                            | <p>Add with AND</p> |

|                                                                                                              |                                                                                                                                                                                                                                                                                                                                                                                                                                                                                                                                                                                                                                                                                                                                                               |                    |
|--------------------------------------------------------------------------------------------------------------|---------------------------------------------------------------------------------------------------------------------------------------------------------------------------------------------------------------------------------------------------------------------------------------------------------------------------------------------------------------------------------------------------------------------------------------------------------------------------------------------------------------------------------------------------------------------------------------------------------------------------------------------------------------------------------------------------------------------------------------------------------------|--------------------|
|                                                                                                              | <p>"community based intervention*" [Text Word] OR<br/> "psychosocial*" [Text Word] OR<br/> "stress management" [Text Word]<br/> OR "personalised medicine" [Text Word] OR "personalized medicine" [Text Word] OR<br/> "integrat*" [Text Word] OR<br/> "healthy living" [Text Word] OR<br/> "physical activity" [Text Word]<br/> OR "behavioural change" [Text Word] OR "behavioral change" [Text Word] OR<br/> "behaviour change" [Text Word] OR<br/> "behavior change" [Text Word] OR<br/> "behaviour modification" [Text Word] OR<br/> "behavior modification" [Text Word] OR<br/> "behavioural modification" [Text Word] OR<br/> "behavioral modification" [Text Word] OR<br/> "patient education" [Text Word]<br/> OR "weight management" [Text Word]</p> |                    |
| <p>Specific components of lifestyle interventions (exercise, diet, nutrition, sleep, smoking cessation).</p> | <p>"Smoking Cessation" [MeSH Terms] OR "Smoking Cessation" [Text Word] OR<br/> "sleep*" [Text Word] OR<br/> "Sleep" [Mesh:NoExp] OR "Diet Therapy" [MeSH Terms:noexp]<br/> OR "nutrition*" [Text Word] OR<br/> "Nutrition</p>                                                                                                                                                                                                                                                                                                                                                                                                                                                                                                                                 | <p>Add with OR</p> |

|                                                                                            |                                                                                                                                                                                                                                                                                                                                                       |              |
|--------------------------------------------------------------------------------------------|-------------------------------------------------------------------------------------------------------------------------------------------------------------------------------------------------------------------------------------------------------------------------------------------------------------------------------------------------------|--------------|
|                                                                                            | Therapy"[Mesh:NoExp] OR<br>"diet*"[Text Word] OR<br>"fitness*"[Text Word] OR<br>"exercise*"[Text Word] OR<br>"Exercise"[Mesh:NoExp] OR<br>"physical therapy"[Text Word]<br>OR "physical activity"[Text<br>Word]                                                                                                                                       |              |
| Randomised controlled trial<br>(Cochrane sensitivity and<br>specificity maximising filter) | ("randomized controlled<br>trial"[Publication Type] OR<br>"controlled clinical<br>trial"[Publication Type] OR<br>"randomized"[Title/Abstract] OR<br>"placebo"[Title/Abstract] OR<br>"clinical trials as topic"[MeSH<br>Terms:noexp] OR<br>"randomly"[Title/Abstract] OR<br>"trial"[Title]) NOT<br>("animals"[MeSH Terms] NOT<br>"humans"[MeSH Terms]) | Add with AND |

# Reporting checklist for protocol of a systematic review and meta analysis.

Based on the PRISMA-P guidelines.

## Instructions to authors

Complete this checklist by entering the page numbers from your manuscript where readers will find each of the items listed below.

Your article may not currently address all the items on the checklist. Please modify your text to include the missing information. If you are certain that an item does not apply, please write "n/a" and provide a short explanation.

Upload your completed checklist as an extra file when you submit to a journal.

In your methods section, say that you used the PRISMA-Reporting guidelines, and cite them as:

Moher D, Shamseer L, Clarke M, Ghersi D, Liberati A, Petticrew M, Shekelle P, Stewart LA. Preferred Reporting Items for Systematic Review and Meta-Analysis Protocols (PRISMA-P) 2015 statement. *Syst Rev.* 2015;4(1):1.

|                     |                     | Reporting Item                                                                                                                            | Page Number |
|---------------------|---------------------|-------------------------------------------------------------------------------------------------------------------------------------------|-------------|
| <b>Title</b>        |                     |                                                                                                                                           |             |
| Identification      | <a href="#">#1a</a> | Identify the report as a protocol of a systematic review                                                                                  | 1           |
| Update              | <a href="#">#1b</a> | If the protocol is for an update of a previous systematic review, identify as such                                                        | n/a         |
| <b>Registration</b> |                     |                                                                                                                                           |             |
|                     | <a href="#">#2</a>  | If registered, provide the name of the registry (such as PROSPERO) and registration number                                                | 4           |
| <b>Authors</b>      |                     |                                                                                                                                           |             |
| Contact             | <a href="#">#3a</a> | Provide name, institutional affiliation, e-mail address of all protocol authors; provide physical mailing address of corresponding author | 1           |

|    |                           |                     |                                                                                                                                                                                                                               |                                    |
|----|---------------------------|---------------------|-------------------------------------------------------------------------------------------------------------------------------------------------------------------------------------------------------------------------------|------------------------------------|
| 1  | Contribution              | <a href="#">#3b</a> | Describe contributions of protocol authors and identify the guarantor of the review                                                                                                                                           | 1 & 16                             |
| 2  |                           |                     |                                                                                                                                                                                                                               |                                    |
| 3  |                           |                     |                                                                                                                                                                                                                               |                                    |
| 4  |                           |                     |                                                                                                                                                                                                                               |                                    |
| 5  | <b>Amendments</b>         |                     |                                                                                                                                                                                                                               |                                    |
| 6  |                           |                     |                                                                                                                                                                                                                               |                                    |
| 7  |                           | <a href="#">#4</a>  | If the protocol represents an amendment of a previously completed or published protocol, identify as such and list changes; otherwise, state plan for documenting important protocol amendments                               | 2                                  |
| 8  |                           |                     |                                                                                                                                                                                                                               |                                    |
| 9  |                           |                     |                                                                                                                                                                                                                               |                                    |
| 10 |                           |                     |                                                                                                                                                                                                                               |                                    |
| 11 |                           |                     |                                                                                                                                                                                                                               |                                    |
| 12 |                           |                     |                                                                                                                                                                                                                               |                                    |
| 13 |                           |                     |                                                                                                                                                                                                                               |                                    |
| 14 | <b>Support</b>            |                     |                                                                                                                                                                                                                               |                                    |
| 15 |                           |                     |                                                                                                                                                                                                                               |                                    |
| 16 | Sources                   | <a href="#">#5a</a> | Indicate sources of financial or other support for the review                                                                                                                                                                 | 16                                 |
| 17 |                           |                     |                                                                                                                                                                                                                               |                                    |
| 18 |                           |                     |                                                                                                                                                                                                                               |                                    |
| 19 |                           |                     |                                                                                                                                                                                                                               |                                    |
| 20 | Sponsor                   | <a href="#">#5b</a> | Provide name for the review funder and / or sponsor                                                                                                                                                                           | 16                                 |
| 21 |                           |                     |                                                                                                                                                                                                                               |                                    |
| 22 | Role of sponsor or funder | <a href="#">#5c</a> | Describe roles of funder(s), sponsor(s), and / or institution(s), if any, in developing the protocol                                                                                                                          | 16                                 |
| 23 |                           |                     |                                                                                                                                                                                                                               |                                    |
| 24 |                           |                     |                                                                                                                                                                                                                               |                                    |
| 25 |                           |                     |                                                                                                                                                                                                                               |                                    |
| 26 | <b>Introduction</b>       |                     |                                                                                                                                                                                                                               |                                    |
| 27 |                           |                     |                                                                                                                                                                                                                               |                                    |
| 28 | Rationale                 | <a href="#">#6</a>  | Describe the rationale for the review in the context of what is already known                                                                                                                                                 | 4-6                                |
| 29 |                           |                     |                                                                                                                                                                                                                               |                                    |
| 30 |                           |                     |                                                                                                                                                                                                                               |                                    |
| 31 |                           |                     |                                                                                                                                                                                                                               |                                    |
| 32 | Objectives                | <a href="#">#7</a>  | Provide an explicit statement of the question(s) the review will address with reference to participants, interventions, comparators, and outcomes (PICO)                                                                      | 6-8                                |
| 33 |                           |                     |                                                                                                                                                                                                                               |                                    |
| 34 |                           |                     |                                                                                                                                                                                                                               |                                    |
| 35 |                           |                     |                                                                                                                                                                                                                               |                                    |
| 36 |                           |                     |                                                                                                                                                                                                                               |                                    |
| 37 |                           |                     |                                                                                                                                                                                                                               |                                    |
| 38 | <b>Methods</b>            |                     |                                                                                                                                                                                                                               |                                    |
| 39 |                           |                     |                                                                                                                                                                                                                               |                                    |
| 40 | Eligibility criteria      | <a href="#">#8</a>  | Specify the study characteristics (such as PICO, study design, setting, time frame) and report characteristics (such as years considered, language, publication status) to be used as criteria for eligibility for the review | 7-8                                |
| 41 |                           |                     |                                                                                                                                                                                                                               |                                    |
| 42 |                           |                     |                                                                                                                                                                                                                               |                                    |
| 43 |                           |                     |                                                                                                                                                                                                                               |                                    |
| 44 |                           |                     |                                                                                                                                                                                                                               |                                    |
| 45 |                           |                     |                                                                                                                                                                                                                               |                                    |
| 46 |                           |                     |                                                                                                                                                                                                                               |                                    |
| 47 | Information sources       | <a href="#">#9</a>  | Describe all intended information sources (such as electronic databases, contact with study authors, trial registers or other grey literature sources) with planned dates of coverage                                         | 8                                  |
| 48 |                           |                     |                                                                                                                                                                                                                               |                                    |
| 49 |                           |                     |                                                                                                                                                                                                                               |                                    |
| 50 |                           |                     |                                                                                                                                                                                                                               |                                    |
| 51 |                           |                     |                                                                                                                                                                                                                               |                                    |
| 52 |                           |                     |                                                                                                                                                                                                                               |                                    |
| 53 |                           |                     |                                                                                                                                                                                                                               |                                    |
| 54 | Search strategy           | <a href="#">#10</a> | Present draft of search strategy to be used for at least one electronic database, including planned limits, such that it could be repeated                                                                                    | n/a -<br>Provided in<br>Appendix 1 |
| 55 |                           |                     |                                                                                                                                                                                                                               |                                    |
| 56 |                           |                     |                                                                                                                                                                                                                               |                                    |
| 57 |                           |                     |                                                                                                                                                                                                                               |                                    |
| 58 |                           |                     |                                                                                                                                                                                                                               |                                    |
| 59 |                           |                     |                                                                                                                                                                                                                               |                                    |
| 60 |                           |                     |                                                                                                                                                                                                                               |                                    |

|    |                    |                      |                                                             |           |
|----|--------------------|----------------------|-------------------------------------------------------------|-----------|
| 1  | Study records -    | <a href="#">#11a</a> | Describe the mechanism(s) that will be used to manage       | 9-10      |
| 2  | data management    |                      | records and data throughout the review                      |           |
| 3  |                    |                      |                                                             |           |
| 4  | Study records -    | <a href="#">#11b</a> | State the process that will be used for selecting studies   | 9-10      |
| 5  | selection process  |                      | (such as two independent reviewers) through each            |           |
| 6  |                    |                      | phase of the review (that is, screening, eligibility and    |           |
| 7  |                    |                      | inclusion in meta-analysis)                                 |           |
| 8  |                    |                      |                                                             |           |
| 9  |                    |                      |                                                             |           |
| 10 |                    |                      |                                                             |           |
| 11 | Study records -    | <a href="#">#11c</a> | Describe planned method of extracting data from             | 9-10      |
| 12 | data collection    |                      | reports (such as piloting forms, done independently, in     |           |
| 13 | process            |                      | duplicate), any processes for obtaining and confirming      |           |
| 14 |                    |                      | data from investigators                                     |           |
| 15 |                    |                      |                                                             |           |
| 16 |                    |                      |                                                             |           |
| 17 |                    |                      |                                                             |           |
| 18 | Data items         | <a href="#">#12</a>  | List and define all variables for which data will be sought | 9-10      |
| 19 |                    |                      | (such as PICO items, funding sources), any pre-planned      |           |
| 20 |                    |                      | data assumptions and simplifications                        |           |
| 21 |                    |                      |                                                             |           |
| 22 |                    |                      |                                                             |           |
| 23 |                    |                      |                                                             |           |
| 24 | Outcomes and       | <a href="#">#13</a>  | List and define all outcomes for which data will be         | 6-8, 9-10 |
| 25 | prioritization     |                      | sought, including prioritization of main and additional     |           |
| 26 |                    |                      | outcomes, with rationale                                    |           |
| 27 |                    |                      |                                                             |           |
| 28 |                    |                      |                                                             |           |
| 29 | Risk of bias in    | <a href="#">#14</a>  | Describe anticipated methods for assessing risk of bias     | 10        |
| 30 | individual studies |                      | of individual studies, including whether this will be done  |           |
| 31 |                    |                      | at the outcome or study level, or both; state how this      |           |
| 32 |                    |                      | information will be used in data synthesis                  |           |
| 33 |                    |                      |                                                             |           |
| 34 |                    |                      |                                                             |           |
| 35 |                    |                      |                                                             |           |
| 36 | Data synthesis     | <a href="#">#15a</a> | Describe criteria under which study data will be            | 10-11     |
| 37 |                    |                      | quantitatively synthesised                                  |           |
| 38 |                    |                      |                                                             |           |
| 39 |                    |                      |                                                             |           |
| 40 | Data synthesis     | <a href="#">#15b</a> | If data are appropriate for quantitative synthesis,         | 10-11     |
| 41 |                    |                      | describe planned summary measures, methods of               |           |
| 42 |                    |                      | handling data and methods of combining data from            |           |
| 43 |                    |                      | studies, including any planned exploration of               |           |
| 44 |                    |                      | consistency (such as I <sup>2</sup> , Kendall's $\tau$ )    |           |
| 45 |                    |                      |                                                             |           |
| 46 |                    |                      |                                                             |           |
| 47 |                    |                      |                                                             |           |
| 48 | Data synthesis     | <a href="#">#15c</a> | Describe any proposed additional analyses (such as          | 10-11     |
| 49 |                    |                      | sensitivity or subgroup analyses, meta-regression)          |           |
| 50 |                    |                      |                                                             |           |
| 51 |                    |                      |                                                             |           |
| 52 | Data synthesis     | <a href="#">#15d</a> | If quantitative synthesis is not appropriate, describe the  | 10-11     |
| 53 |                    |                      | type of summary planned                                     |           |
| 54 |                    |                      |                                                             |           |
| 55 |                    |                      |                                                             |           |
| 56 | Meta-bias(es)      | <a href="#">#16</a>  | Specify any planned assessment of meta-bias(es) (such       | 12        |
| 57 |                    |                      | as publication bias across studies, selective reporting     |           |
| 58 |                    |                      | within studies)                                             |           |
| 59 |                    |                      |                                                             |           |
| 60 |                    |                      |                                                             |           |

1 Confidence in [#17](#) Describe how the strength of the body of evidence will 12-13  
2 cumulative  
3 be assessed (such as GRADE)  
4 evidence  
5

6 Notes:  
7

- 8  
9 • 10: n/a - Provided in Appendix 1 The PRISMA-P elaboration and explanation paper is distributed  
10 under the terms of the Creative Commons Attribution License CC-BY. This checklist was  
11 completed on 21. March 2023 using <https://www.goodreports.org/>, a tool made by the [EQUATOR](#)  
12 [Network](#) in collaboration with [Penelope.ai](#)  
13  
14  
15  
16  
17  
18  
19  
20  
21  
22  
23  
24  
25  
26  
27  
28  
29  
30  
31  
32  
33  
34  
35  
36  
37  
38  
39  
40  
41  
42  
43  
44  
45  
46  
47  
48  
49  
50  
51  
52  
53  
54  
55  
56  
57  
58  
59  
60

# BMJ Open

## The Effectiveness of Lifestyle Interventions for Improving the Physical Health of Children and Adolescents Taking Antipsychotic Medications: Protocol for a Systematic Review and Meta-Analysis.

|                                 |                                                                                                                                                                                                                                                                                                                                                                                                                                                                                                                                                                                                                                                                                                                                                                                                                    |
|---------------------------------|--------------------------------------------------------------------------------------------------------------------------------------------------------------------------------------------------------------------------------------------------------------------------------------------------------------------------------------------------------------------------------------------------------------------------------------------------------------------------------------------------------------------------------------------------------------------------------------------------------------------------------------------------------------------------------------------------------------------------------------------------------------------------------------------------------------------|
| Journal:                        | <i>BMJ Open</i>                                                                                                                                                                                                                                                                                                                                                                                                                                                                                                                                                                                                                                                                                                                                                                                                    |
| Manuscript ID                   | bmjopen-2023-073893.R1                                                                                                                                                                                                                                                                                                                                                                                                                                                                                                                                                                                                                                                                                                                                                                                             |
| Article Type:                   | Protocol                                                                                                                                                                                                                                                                                                                                                                                                                                                                                                                                                                                                                                                                                                                                                                                                           |
| Date Submitted by the Author:   | 25-Sep-2023                                                                                                                                                                                                                                                                                                                                                                                                                                                                                                                                                                                                                                                                                                                                                                                                        |
| Complete List of Authors:       | Hawker, Patrick; UNSW, Discipline of Psychiatry & Mental Health<br>Bellamy, Jessica; University of Wollongong<br>McHugh, Catherine; UNSW, Discipline of Psychiatry & Mental Health<br>Wong, Tsz Ying; UNSW, Discipline of Psychiatry & Mental Health<br>Williams, Katrina; Monash University<br>Wood, Amanda; Murdoch Children's Research Institute<br>Anderson, Vicki; The Royal Children's Hospital Melbourne<br>Tonge, Bruce J.; Monash University<br>Ward, Philip ; UNSW, Discipline of Psychiatry & Mental Health<br>Sciberras, Emma; Deakin University<br>Bellgrove, Mark; Monash University<br>Silk, Tim; Deakin University<br>Lin, Ping-I; UNSW; Neuroscience Research Australia<br>Eapen, Valsamma; South Western Sydney Local Health District, ICAMHS;<br>UNSW, Discipline of Psychiatry & Mental Health |
| <b>Primary Subject Heading</b>: | Health services research                                                                                                                                                                                                                                                                                                                                                                                                                                                                                                                                                                                                                                                                                                                                                                                           |
| Secondary Subject Heading:      | Mental health, Cardiovascular medicine, Pharmacology and therapeutics, Sports and exercise medicine                                                                                                                                                                                                                                                                                                                                                                                                                                                                                                                                                                                                                                                                                                                |
| Keywords:                       | Child & adolescent psychiatry < PSYCHIATRY, Adolescent, PSYCHIATRY, PAEDIATRICS                                                                                                                                                                                                                                                                                                                                                                                                                                                                                                                                                                                                                                                                                                                                    |
|                                 |                                                                                                                                                                                                                                                                                                                                                                                                                                                                                                                                                                                                                                                                                                                                                                                                                    |

SCHOLARONE™  
Manuscripts

1  
2  
3 **The Effectiveness of Lifestyle Interventions for Improving the Physical Health of**  
4 **Children and Adolescents Taking Antipsychotic Medications: Protocol for a Systematic**  
5 **Review and Meta-Analysis.**  
6  
7  
8  
9  
10

11 Patrick Hawker ([p.hawker@unsw.edu.au](mailto:p.hawker@unsw.edu.au)),<sup>1</sup> Jessica Bellamy ([jbellamy@uow.edu.au](mailto:jbellamy@uow.edu.au)),<sup>2</sup>  
12 Catherine McHugh ([c.mchugh@unsw.edu.au](mailto:c.mchugh@unsw.edu.au)),<sup>1</sup> Tsz Ying Wong  
13 ([tsz\\_ying.wong@unsw.edu.au](mailto:tsz_ying.wong@unsw.edu.au)),<sup>1</sup> Katrina Williams ([katrina.williams@monash.edu](mailto:katrina.williams@monash.edu)),<sup>4</sup> Amanda  
14 Wood ([amanda.wood@mcri.edu.au](mailto:amanda.wood@mcri.edu.au)),<sup>3</sup> Vicki Anderson ([vicki.anderson@rch.org.au](mailto:vicki.anderson@rch.org.au)),<sup>6</sup> Bruce  
15 Tonge ([bruce.tonge@monash.edu](mailto:bruce.tonge@monash.edu)),<sup>4</sup> Philip Ward ([p.ward@unsw.edu.au](mailto:p.ward@unsw.edu.au)),<sup>1</sup> Emma Sciberras  
16 ([emma.sciberras@deakin.edu.au](mailto:emma.sciberras@deakin.edu.au)),<sup>5</sup> Mark Bellgrove ([mark.bellgrove@monash.edu](mailto:mark.bellgrove@monash.edu)),<sup>4</sup> Tim Silk  
17 ([tim.silk@deakin.edu.au](mailto:tim.silk@deakin.edu.au)),<sup>5</sup> Ping-I Lin,<sup>1,7</sup> ([daniel.lin@unsw.edu.au](mailto:daniel.lin@unsw.edu.au)) Valsamma Eapen  
18 ([v.eapen@unsw.edu.au](mailto:v.eapen@unsw.edu.au))<sup>1\*</sup>  
19  
20  
21  
22  
23  
24  
25  
26  
27

28 <sup>1</sup> Discipline of Psychiatry & Mental Health, University of New South Wales, Sydney, NSW,  
29 Australia  
30

31  
32 <sup>2</sup> School of Medical, Indigenous and Health Sciences, Faculty of Science, Medicine &  
33 Health, University of Wollongong, Wollongong, NSW, Australia  
34

35  
36 <sup>3</sup> Murdoch Children's Research Institute (MCRI), Melbourne, VIC, Australia  
37

38  
39 <sup>4</sup> Monash University, Melbourne, VIC, Australia  
40

41  
42 <sup>5</sup> Deakin University, Melbourne, VIC, Australia  
43

44  
45 <sup>6</sup> The Royal Children's Hospital, Melbourne, VIC, Australia  
46

47  
48 <sup>7</sup> Neuroscience Research Australia (NeuRA), NSW, Australia  
49

50  
51 **\*Corresponding Author and Review Guarantor**  
52

53 Professor Valsamma Eapen  
54

55 Email: [v.eapen@unsw.edu.au](mailto:v.eapen@unsw.edu.au)  
56

57  
58 Mailing Address: Level 3, AGSM Building (G27), Gate 11, Botany St, UNSW Sydney  
59 Campus, Kensington NSW 2052  
60

**Keywords:** Child; Adolescent; Antipsychotic Agents; Metabolic Syndrome; Weight Gain; Psychosocial Intervention.

**Word Count:** 2,833

## ABSTRACT

**Introduction:** Children and adolescents are increasingly prescribed antipsychotic medications off-label in the treatment of behavioural disorders. While antipsychotic medications are effective in managing behavioural issues, they carry a significant risk of adverse events which compromises ongoing physical health. Of particular concern is the negative impact antipsychotic medications have on cardiometabolic health. Interventions which aim to modify lifestyle habits have the potential to alleviate the adverse effects of antipsychotic medication by enhancing weight management, increasing physical activity, promoting better nutritional practices, improving dietary habits, and promoting healthier sleep patterns and sleep hygiene. However, a comprehensive review has not been performed to ascertain the effectiveness of lifestyle interventions for children and adolescents who are at increased risk of antipsychotic-induced compromises to their physical health.

**Methods and analysis:** This systematic review will follow the Preferred Reporting Items for Systematic Reviews and Meta-Analyses guidelines. Four databases will be searched without any year constraints, to identify randomised controlled trials which are published in the English language and report a lifestyle intervention compared to usual care with any physical health outcome measure. Trial registers and results repositories will be scoured to identify additional studies. Two reviewers will independently conduct screening, data extraction, and quality assessment, and compare results. Quantitative data will be synthesized, where appropriate, through a random-effects meta-analysis model. Otherwise, data will be reported in a qualitative (narrative) synthesis. Heterogeneity will be quantified using the  $I^2$  statistic. The Cochrane Risk of Bias 2 tool be used for risk of bias assessment. The Grading of Recommendations, Assessment, Development, and Evaluation system will be used to evaluate the cumulative body of evidence.

**Ethics and Dissemination:** Ethics approval not required. Publication plan will target high-impact, peer reviewed journals which fall under the scope of Psychiatry & Mental Health.

**Trial Registration:** Registered with PROSPERO (CRD42022380277).

## STRENGTHS AND LIMITATIONS OF THIS STUDY

- By combining data from multiple studies, this systematic review is expected to provide greater statistical power to detect differences between intervention and control groups than individual studies alone.
- By analysing the existing evidence base on lifestyle interventions, this systematic review can identify gaps where further research is needed to address unanswered questions or resolve conflicting findings.
- A potentially limiting factor of this study is the heterogeneity of lifestyle interventions, which could hinder the ability to reach definitive conclusions about their effectiveness.
- A potential limitation of this study is that the quality of included studies may vary significantly, potentially impacting the robustness of the findings.

## INTRODUCTION

While antipsychotic medications are efficacious in treating a range of complex psychiatric disorders, the utility of these drugs is hampered by their tendency to elicit a range of adverse effects which compromises ongoing health.(1) Interventions which aim to modify lifestyle habits have the potential to alleviate the adverse effects of antipsychotic medication by enhancing weight management, increasing physical activity, promoting better nutritional practices, and improving dietary habits.(2) Recent work suggests that broadening intervention scope beyond diet and exercise, specifically those that incorporate sleep improvement and nicotine reduction programs, could effectively improve metabolic parameters and lower cardiovascular risk of individuals who take antipsychotic medications.(3, 4)

The effectiveness of lifestyle interventions for reducing weight gain has been comprehensively studied in adult populations with serious mental illness (SMI) who take antipsychotic medications.(2, 5-7) Adults with SMI are at increased risk of weight gain due to a combination of factors related to impaired functioning and motivation, but particularly due to antipsychotic treatment initiation.(8) During intervention periods, different components of lifestyle interventions can improve anthropometric measures (weight, body mass index (BMI), and waist circumference), reduce diastolic blood pressure, pressure, reduce blood sugar, improve

1  
2  
3 physical fitness, and improve dietary habits for adults with SMI.(2, 5-7, 9) However, a  
4 comprehensive evaluation of lifestyle interventions for children and adolescents who take  
5 antipsychotic medications is lacking.  
6  
7

8  
9 Select antipsychotic medications are approved to treat child psychiatric disorders including  
10 childhood schizophrenia and bipolar mania,(10) Tourette's Syndrome,(11) and aggression and  
11 irritability in children with autism spectrum disorder (ASD).(12, 13) Antipsychotic  
12 medications are also prescribed off-label to children and adolescents, including those with  
13 neurodevelopmental disorders, to manage disruptive behaviour resistant to other forms of  
14 treatment.(1, 14) In fact, the most common use of antipsychotic medications in paediatrics is  
15 to treat disruptive behaviours and not psychotic disorders.(15)  
16  
17

18  
19 While there is some evidence that short term antipsychotic use may reduce aggression and  
20 conduct problems in children and adolescents with disruptive behaviour disorders,(14, 16-19)  
21 antipsychotic medications carry a significant risk of adverse events which compromise ongoing  
22 health.(1, 14, 20) These adverse events include metabolic disturbances, sedation/somnolence,  
23 prolactin elevation, sexual dysfunction, cardiological and haematological adverse events,  
24 neurological adverse events, and even behavioural adverse events, including psychomotor  
25 retardation, anorexia, agitation, or lack of spontaneity.(1, 20) Cardiometabolic disturbances  
26 are the most clinically significant in this population, due to the propensity for continued  
27 complications in adulthood and long-term morbidity costs.(21) Common cardiometabolic  
28 complications from antipsychotic medication use includes weight gain, dyslipidaemia, elevated  
29 blood pressure, and increased risk of type-2 diabetes.(22-24) There is increasing evidence to  
30 suggest that compared to adults, children and adolescents are more susceptible to developing  
31 cardiometabolic complications from antipsychotic use,(1, 25-29) particularly children with  
32 ASD.(25, 30) Antipsychotic prescription to children and adolescents is increasing  
33 internationally.(31-34)  
34  
35

36  
37 Given that most lifestyle interventions targeting the physical health impact of antipsychotics  
38 have been conducted in adults with SMI, the effectiveness of these interventions in children  
39 and adolescents taking antipsychotics is unknown. Children and adolescents represent a unique  
40 cohort due to their relatively early stage of development which promotes susceptibility to the  
41 adverse cardiometabolic effects of antipsychotics.(1, 25-29) Those with neurodevelopmental  
42 disorders may have specific lifestyle challenges such as heightened sedentary behaviour,(35)  
43 poor diet and nutrition,(36, 37) disrupted sleep,(38) and frequent tobacco use.(39, 40) A distinct  
44  
45  
46  
47  
48  
49  
50  
51  
52  
53  
54  
55  
56  
57  
58  
59  
60

subset of this group are those prescribed antipsychotic medications. They typically present with severely disruptive behaviours and have a high likelihood of comorbid mental health diagnoses.<sup>(15)</sup> Moreover, antipsychotic medications themselves may impose changes to lifestyle such as dysregulated appetite control<sup>(8, 41)</sup> or altered sleep patterns.<sup>(42)</sup> Hence, this cohort requires an individualised strategy, one that may not be generalisable to a wider child and adolescent cohort. Such strategies should cater to their unique needs and may involve the participation of caregivers and families, or be adapted according to the developmental age and communication style of the young person.

Due to recurrent disruptive behaviour, children and adolescents who are started on psychotropic medicines tend to continue taking them for prolonged periods.<sup>(43)</sup> While several guidelines exist recommending psychological and environmental interventions as the first-line treatment for disruptive behaviours (e.g., UK NICE guidelines, Frith Prescribing Guidelines, STOMP), their implementation in practice is inadequate.<sup>(43-45)</sup> Given the potential impacts on long-term cardiometabolic health, an intervention strategy should be co-provided with antipsychotic pharmacotherapy for youth identified at risk of physical health deterioration. Hence, it should be investigated whether early lifestyle interventions targeted at children and adolescents prescribed antipsychotics can mitigate poor physical health outcomes during critical health periods and reduce the translation to overweight, obesity, and other cardiometabolic risk factors to adulthood.

## OBJECTIVES

The purpose of this systematic review is to evaluate the effectiveness of lifestyle interventions for improving the physical health of children and adolescents (aged 6 to 17 years) who are taking antipsychotic medications. Specifically, the proposed study will aim to answer the following research questions:

- 1. For children and adolescents taking antipsychotic medications, do lifestyle interventions reduce the risk of compromised physical health (see Table 1 for the list of physical health outcome measures) compared to treatment as usual (i.e., participants who receive standard medical care services but no specific intervention for lifestyle support)?*
- 2. Which individual or combined components of a lifestyle intervention are the most effective in reducing the risk of physical health decline?*

### Primary Outcome Measure

While all relevant physical health outcomes will be considered (see Table 1), the primary outcome measure will be the difference in body mass index (BMI) between control and intervention groups. BMI was selected as the primary outcome measure as it is the most robust indicator to identify individuals whose excess adiposity puts them at increased cardiometabolic risk.<sup>(46)</sup> Where other measures of physical health are reported, they will be included (see Table 1).

## METHODS AND ANALYSIS

This systematic review protocol was developed with the PRISMA-P reporting guidelines (see Appendix 1).<sup>(47)</sup>

### Patient and Public Involvement

No patients involved.

## ELIGIBILITY CRITERIA

The eligibility criteria are described in Table 1, below.

**Table 1:** Eligibility criteria organised in accordance with the population, interventions, comparisons, outcomes, setting, and study design (PICOS) reporting structure.

|                      |                                                                                                                                                                                                                                                                                                                                                                                                                                                                         |
|----------------------|-------------------------------------------------------------------------------------------------------------------------------------------------------------------------------------------------------------------------------------------------------------------------------------------------------------------------------------------------------------------------------------------------------------------------------------------------------------------------|
| <b>Population</b>    | Youth aged 6 to 17 years who are taking antipsychotic medications. Youth most likely to be taking antipsychotic medications include those diagnosed with a neurodevelopmental disorder (i.e., ID, ASD, ADHD, TS) and comorbid disruptive behaviour disorder/behavioural issues, or youth with first-episode psychosis, childhood schizophrenia or bipolar mania. Study will be eligible for inclusion if $\geq 70\%$ of the sample is taking antipsychotic medications. |
| <b>Interventions</b> | All interventions which incorporate a 'lifestyle' intervention component and aim to improve physical health outcomes will be eligible. This includes any educational, psychotherapeutic, social, and behavioural intervention which aims to increase exercise or physical activity, optimise dietary intake, aid nicotine cessation, or improve sleep quality and duration.                                                                                             |

|                                           |                                                                                                                                                                                                                                                                                                                                                                                                                                                                                                                                                                                                                                                                                                                                                                                                                                                                                                                                                                                                                                                                              |
|-------------------------------------------|------------------------------------------------------------------------------------------------------------------------------------------------------------------------------------------------------------------------------------------------------------------------------------------------------------------------------------------------------------------------------------------------------------------------------------------------------------------------------------------------------------------------------------------------------------------------------------------------------------------------------------------------------------------------------------------------------------------------------------------------------------------------------------------------------------------------------------------------------------------------------------------------------------------------------------------------------------------------------------------------------------------------------------------------------------------------------|
| <b>Comparisons</b>                        | All relevant control interventions will be included (i.e., treatment as usual/usual care, placebo, no treatment, waiting list).                                                                                                                                                                                                                                                                                                                                                                                                                                                                                                                                                                                                                                                                                                                                                                                                                                                                                                                                              |
| <b>Outcomes</b>                           | <p>Physical health outcomes which will be <b>included</b>:</p> <ol style="list-style-type: none"> <li>1) Anthropometric measures, including weight, height, waist circumference, or BMI percentile.</li> <li>2) Blood pressure.</li> <li>3) Metabolic or biological markers, including glucose and lipid levels, haemoglobin A1c (HbA1c), C-reactive protein or other relevant blood and serum markers.</li> <li>4) Presence of cardiovascular or respiratory disease.</li> <li>5) Physical health behaviour, including physical activity levels, smoking/vaping behaviour, dietary intake, sleep quality and duration, engagement in treatment and attendance.</li> <li>6) Indicators of physical fitness, including aerobic capacity (i.e., VO<sub>2</sub> Max), and muscle strength.</li> <li>7) Physical health-related quality of life.</li> <li>8) Side effects of antipsychotics, including adverse drug reactions.</li> </ol> <p>Physical health outcomes which will be <b>excluded</b>:</p> <ol style="list-style-type: none"> <li>1) Motor development.</li> </ol> |
| <b>Setting</b>                            | All settings will be included: primary and secondary care, hospital (inpatient or outpatient), community and school-based service provisions, or remote (digital application-based or telehealth/web health services).                                                                                                                                                                                                                                                                                                                                                                                                                                                                                                                                                                                                                                                                                                                                                                                                                                                       |
| <b>Study Design &amp; Characteristics</b> | Applicable RCTs published in the English language will be included. All years will be considered, and no date restrictions will be applied. Pseudorandomised control trials, comparative studies with concurrent controls, case series and cohort studies will be excluded. Conference abstracts, dissertations/theses, papers which are not peer-reviewed, and papers published in a language other than English will be excluded.                                                                                                                                                                                                                                                                                                                                                                                                                                                                                                                                                                                                                                          |

## INFORMATION SOURCES

The literature search will be executed using MeSH terms and keywords related to lifestyle interventions in the population under investigation (as outlined in Table 1). Four databases, including MEDLINE (via PubMed), EMBASE (via Ovid), the Cochrane Central Register of Controlled Trials (CENTRAL), and PsycINFO, will be searched without any year constraints. The results will be restricted to studies published in English and employing a randomized

1  
2  
3 controlled trial (RCT) design. The search process will be guided by the Cochrane Handbook  
4 for Systematic Reviews to determine the most appropriate RCT design filter for each database.  
5 To ensure literature saturation, the reference lists of included studies will be scanned to identify  
6 additional relevant articles. Google Scholar's 'cited by' function will be used to search for  
7 relevant articles which cite the included studies. Trial registers and results repositories will be  
8 scoured, including ClinicalTrials.gov and the World Health Organisation (WHO) International  
9 Clinical Trials Registry Platform (ICTRP) portal, in accordance with the Cochrane  
10 guidelines.(48) To account for the emergence of new studies published in the period after initial  
11 searches were performed, searches will be re-run before final data analysis.  
12  
13  
14  
15  
16  
17  
18

### 19 SEARCH STRATEGY

20  
21 The development of the search strategies for each database will be conducted with the oversight  
22 of a Medicine & Health academic librarian who possesses expertise in systematic review  
23 searching. The project team will contribute to the development of the strategies, which will be  
24 peer-reviewed by the academic librarian. The draft strategy for MEDLINE is presented in  
25 Appendix 2. After finalising the MEDLINE strategy, it will be adapted to the syntax and MeSH  
26 terms/subject headings of the other databases. The validity of the search strategies will be  
27 evaluated to ensure a high yield of eligible studies from all relevant databases.  
28  
29  
30  
31  
32  
33  
34  
35  
36

### 37 STUDY RECORDS

38  
39 Literature search results from electronic databases will be uploaded to Covidence software  
40 for systematic reviews.(49) Two reviewers will independently screen the title and abstract of  
41 each study to determine eligibility. The full text of eligible studies will be obtained and  
42 screened against the inclusion criteria. The data from the included studies will be extracted  
43 and entered into Covidence by two independent reviewers. Duplicate entries will be removed  
44 and discrepancies between the two reviewers' data will be resolved through discussion and  
45 consensus. Any unresolved conflicts between the two primary reviewers will be settled by a  
46 third reviewer. The data will be regularly backed up to ensure data integrity and to prevent  
47 loss of information. Access to the data will be restricted to authorized personnel and will be  
48 protected by secure passwords. The data collected for the systematic review will be retained  
49 for a minimum of 5 years after publication of the review, as per UNSW's recommended  
50 retention periods for research data and records. Upon finalization of results, the data will be  
51 securely uploaded to a suitable repository.  
52  
53  
54  
55  
56  
57  
58  
59  
60

## DATA ITEMS AND OUTCOMES

All outcomes which relate to physical health will be extracted for analysis, including the following: (1) Anthropometric measures, including weight, height, waist circumference, or BMI percentile; (2) Blood pressure; (3) Indicators of physical fitness, including aerobic capacity (i.e., VO2 Max), and muscle strength; (4) Metabolic or biological markers, including glucose and lipid levels, proportion with abnormal glucose or lipid parameters, haemoglobin A1c (HbA1c), C-reactive protein or other relevant blood and serum markers; (5) Presence of cardiovascular illness, including myocardial infarction, stroke, transient ischemic attack, and pulmonary embolism; (6) Presence of respiratory illness, including lung cancer and chronic obstructive pulmonary disease (COPD); (7) Physical health behaviour, including physical activity levels, smoking/vaping behaviour, dietary intake, sleep habits, and appointment attendance; (8) Physical health-related quality of life; and (9) Side effects, including adverse drug reactions.

### Missing Data

To ensure that all relevant data is included in the meta-analysis, authors of included studies will be contacted to request any missing data. For initial contact, a polite and respectful email will be sent to the corresponding author of each study, introducing the meta-analysis and the purpose of the request for missing data. If there is no response to the initial email, a follow-up email or phone call will be made after two weeks. If there is still no response after the follow-up, a final reminder will be sent after one week, highlighting the importance of the missing data and its impact on the meta-analysis results. All attempts to contact the investigators and the responses received will be documented in the meta-analysis study protocol.

## RISK OF BIAS ASSESSMENT

The risk of bias will be assessed using the Cochrane Risk of Bias Tool for RCTs (RoB 2)(50). Rob 2 assesses bias in five domains, which each incorporate one or more signalling questions that leads to judgements of “low risk of bias”, “some concerns,” or “high risk of bias”. These judgements lead to an overall risk-of-bias judgement for the included studies, enabling users

1  
2  
3 to stratify meta-analyses bias according to the risk of bias of individual studies.(50) To ensure  
4 rigour, two reviewers will independently perform quality assessment and compare results. A  
5 third reviewer will be available to settle any disagreement between the two reviewers.  
6  
7  
8  
9

## 10 DATA

### 11 SYNTHESIS

12  
13  
14  
15  
16 Data on relevant outcome measures will be extracted from articles using a standardised data  
17 extraction form. Quantitative data will be synthesized, where appropriate, through a random-  
18 effects meta-analysis model. Effect size data will be extracted with 95% confidence intervals  
19 (CI) for relevant outcomes, in addition to the number of participants (*n*) in the lifestyle  
20 intervention or control group for each effect size. Where not possible to extract effect size data  
21 for the meta-analysis, data will be reported in a qualitative (narrative) synthesis. Effect size  
22 data with 95% CI for relevant outcomes will be recalculated as a standardised mean difference  
23 (SMD), to express the mean difference between groups in standard deviation (*SD*) units with a  
24 95% CI. SMDs of less than 0.2 will be considered negligible, SMD between 0.2 and < 0.5  
25 small, SMD between 0.5 and <0.8 medium, and SMD  $\geq 0.8$  large.(51) Risk ratios (RRs) will be  
26 used for categorical outcomes. Odds ratios will be recalculated as RRs. Heterogeneity will be  
27 quantified using the  $I^2$  statistic, with scores of <25%, 25-50% and >50% indicating low,  
28 moderate, and high heterogeneity, respectively. Forest plots will be generated to show SMD  
29 with CIs for each study and the overall random pooled effects estimate. Analyses will be  
30 performed using R statistical analysis software.(52)  
31  
32  
33  
34  
35  
36  
37  
38  
39  
40  
41  
42  
43  
44  
45

### 46 Subgroup Analysis

47 To explore potential sources of variability in the data, subgroup analyses will be conducted  
48 based on the following variables:  
49

- 50  
51 1. Patient demographics (age, gender, and diagnosis) will be considered, and categorical  
52 or meta-regression analysis will be employed to examine the relationship between  
53 mean age and SMD for continuous variables.  
54  
55
- 56  
57 2. Type of antipsychotic medication.  
58
- 59  
60 3. Duration of lifestyle intervention treatment.

- 1  
2  
3 4. Length of follow-up period (3, 6, and 12 months).  
4  
5  
6  
7

### 8 **Sensitivity Analysis**

9  
10 Sensitivity analyses will be conducted to assess the robustness of the results and to identify  
11 any sources of heterogeneity in the data. This will be performed by excluding studies with a  
12 high risk of bias, as well as by excluding studies with specific characteristics (e.g., short  
13 follow-up period, small sample size, etc.).  
14  
15  
16  
17

### 18 **META-BIAS(ES)**

19  
20 The systematic review will include an assessment of meta-bias to ensure the validity of the  
21 results. As described, to ensure a robust assessment of individual RCTs, the review team will  
22 utilize the Cochrane RoB 2 tool.<sup>(50)</sup> Sensitivity analysis will allow assessment of the  
23 robustness of results and identification of any sources of heterogeneity in the data.  
24  
25  
26  
27  
28  
29  
30  
31

### 32 **Additional Assessments of Meta-Bias**

33  
34 The evaluation of outcome reporting bias within the included studies will be conducted through  
35 a comparison of the reported data to the data outlined in the original study protocol or registry,  
36 if available. This will promote transparency in the reporting of all relevant data. Funnel plot  
37 analysis will be performed to assess the presence of publication bias. The funnel plot will be  
38 created using the standard error of each study's effect size, and the symmetry of the plot will  
39 be visually inspected to assess the presence of publication bias. Additionally, formal tests of  
40 funnel plot asymmetry, such as Egger's regression test or the Begg's test, will be performed to  
41 provide a statistical evaluation of funnel plot asymmetry. The results of the analysis will  
42 provide an indication of the likelihood of publication bias and inform the interpretation of the  
43 overall results of the meta-analysis. In addition, the results of this systematic review will be  
44 compared with other relevant systematic reviews to ensure that the findings are in line with  
45 previous research. Any discrepancies will be investigated to identify any potential sources of  
46 meta-bias.  
47  
48  
49  
50  
51  
52  
53  
54  
55  
56  
57  
58  
59  
60

### **Confidence in Cumulative Evidence**

The present systematic review and meta-analysis will utilize the GRADE (Grading of Recommendations, Assessment, Development, and Evaluation) system<sup>(53)</sup> for assessing the strength of the body of evidence. The GRADE system offers a transparent and standardized method for evaluating the strength of the evidence, providing a basis for informed decision making. The quality of evidence will be classified into one of four levels- high, moderate, low, or very low- based on the anticipated impact of further research on the confidence in the estimate of effect. GRADE will be applied to three anthropometric assessments of cardiometabolic health (BMI, waist circumference, and blood pressure). The GRADE system is widely recognized as a credible and validated approach in systematic reviews and meta-analyses, with extensive validation and usage in the field.<sup>(53)</sup>

### **AUTHORS' CONTRIBUTIONS**

PH conceptualised and designed the systematic review with input from JB, CM, TYW, KW, AW, VA, PL, BT, PW, ES, MB, TS, and VE. CM, VE, and PW supervised the project.

### **COMPETING INTERESTS STATEMENT**

Authors have no competing interests to declare.

### **FUNDING**

This systematic review is funded by Growing Minds Australia via the National Health and Medical Research Council (NHMRC; Grant ID: MRF2006438 (2020 MRFF Million Minds Mission) and sponsored by the University of New South Wales (UNSW), Sydney. The funding source (NHMRC Million Minds Mission) has no role in the design of this study and will not have any role during its execution, analyses, interpretation of the data, or decision to submit results.

### **ACKNOWLEDGEMENTS**

We express our gratitude to Samantha Bowen (UNSW), for her valuable review and insightful evaluation of our search strategy. We also extend our appreciation to Nancy Briggs (UNSW) for her thorough examination and constructive input on our data synthesis approach.

## REFERENCES

1. Iasevoli F, Barone A, Buonaguro EF, Vellucci L, de Bartolomeis A. Safety and tolerability of antipsychotic agents in neurodevelopmental disorders: a systematic review. *Expert Opin Drug Saf.* 2020;19(11):1419-44, doi:10.1080/14740338.2020.1820985
2. Naslund JA, Whiteman KL, McHugo GJ, Aschbrenner KA, Marsch LA, Bartels SJ. Lifestyle interventions for weight loss among overweight and obese adults with serious mental illness: A systematic review and meta-analysis. *General Hospital Psychiatry.* 2017;47:83-102, doi:<https://doi.org/10.1016/j.genhosppsych.2017.04.003>
3. Green CA, Yarborough BJH, Leo MC, Yarborough MT, Stumbo SP, Janoff SL, et al. The STRIDE Weight Loss and Lifestyle Intervention for Individuals Taking Antipsychotic Medications: A Randomized Trial. *American Journal of Psychiatry.* 2015;172(1):71-81, doi:10.1176/appi.ajp.2014.14020173
4. Baker AL, Richmond R, Kay-Lambkin FJ, Fila SL, Castle D, Williams JM, et al. Randomised controlled trial of a healthy lifestyle intervention among smokers with psychotic disorders: Outcomes to 36 months. *Australian & New Zealand Journal of Psychiatry.* 2017;52(3):239-52, doi:10.1177/0004867417714336
5. Vancampfort D, Firth J, Correll CU, Solmi M, Siskind D, De Hert M, et al. The impact of pharmacological and non-pharmacological interventions to improve physical health outcomes in people with schizophrenia: a meta-review of meta-analyses of randomized controlled trials. *World Psychiatry.* 2019;18(1):53-66, doi:<https://doi.org/10.1002/wps.20614>
6. Speyer H, Jakobsen AS, Westergaard C, Nørgaard HCB, Jørgensen KB, Pisinger C, et al. Lifestyle Interventions for Weight Management in People with Serious Mental Illness: A Systematic Review with Meta-Analysis, Trial Sequential Analysis, and Meta-Regression Analysis Exploring the Mediators and Moderators of Treatment Effects. *Psychother Psychosom.* 2019;88(6):350-62, doi:10.1159/000502293
7. Bradley T, Campbell E, Dray J, Bartlem K, Wye P, Hanly G, et al. Systematic review of lifestyle interventions to improve weight, physical activity and diet among people with a mental health condition. *Systematic Reviews.* 2022;11(1):198, doi:10.1186/s13643-022-02067-3
8. Dayabandara M, Hanwella R, Ratnatunga S, Seneviratne S, Suraweera C, de Silva VA. Antipsychotic-associated weight gain: management strategies and impact on treatment adherence. *Neuropsychiatr Dis Treat.* 2017;13:2231-41, doi:10.2147/ndt.S113099
9. Gates J, Killackey E, Phillips L, Álvarez-Jiménez M. Mental health starts with physical health: current status and future directions of non-pharmacological interventions to improve physical health in first-episode psychosis. *The Lancet Psychiatry.* 2015;2(8):726-42, doi:[https://doi.org/10.1016/S2215-0366\(15\)00213-8](https://doi.org/10.1016/S2215-0366(15)00213-8)
10. Fraguas D, Correll CU, Merchán-Naranjo J, Rapado-Castro M, Parellada M, Moreno C, et al. Efficacy and safety of second-generation antipsychotics in children and adolescents with psychotic and bipolar spectrum disorders: Comprehensive review of prospective head-to-head and placebo-controlled comparisons. *European Neuropsychopharmacology.* 2011;21(8):621-45, doi:<https://doi.org/10.1016/j.euroneuro.2010.07.002>

11. Huys D, Hardenacke K, Poppe P, Bartsch C, Baskin B, Kuhn J. Update on the role of antipsychotics in the treatment of Tourette syndrome. *Neuropsychiatr Dis Treat*. 2012;8:95-104, doi:10.2147/ndt.S12990
12. Jensen PS, Youngstrom EA, Steiner H, Findling RL, Meyer RE, Malone RP, et al. Consensus Report on Impulsive Aggression as a Symptom Across Diagnostic Categories in Child Psychiatry: Implications for Medication Studies. *Journal of the American Academy of Child & Adolescent Psychiatry*. 2007;46(3):309-22, doi:<https://doi.org/10.1097/chi.0b013e31802f1454>
13. McDougle CJ, Stigler KA, Erickson CA, Posey DJ. Atypical antipsychotics in children and adolescents with autistic and other pervasive developmental disorders. *Journal of Clinical Psychiatry*. 2008;69:15
14. Loy JH, Merry SN, Hetrick SE, Stasiak K. Atypical antipsychotics for disruptive behaviour disorders in children and youths. *Cochrane Database Syst Rev*. 2017;8(8):Cd008559, doi:10.1002/14651858.CD008559.pub3
15. Penfold RB, Stewart C, Hunkeler EM, Madden JM, Cummings JR, Owen-Smith AA, et al. Use of antipsychotic medications in pediatric populations: what do the data say? *Curr Psychiatry Rep*. 2013;15(12):426, doi:10.1007/s11920-013-0426-8
16. Fung LK, Mahajan R, Nozzolillo A, Bernal P, Krasner A, Jo B, et al. Pharmacologic Treatment of Severe Irritability and Problem Behaviors in Autism: A Systematic Review and Meta-analysis. *Pediatrics*. 2016;137 Suppl 2:S124-35, doi:10.1542/peds.2015-2851K
17. Breaux R, Dunn NC, Swanson CS, Larkin E, Waxmonsky J, Baweja R. A Mini-Review of Pharmacological and Psychosocial Interventions for Reducing Irritability Among Youth With ADHD. *Frontiers in Psychiatry*. 2022;13
18. McQuire C, Hassiotis A, Harrison B, Pilling S. Pharmacological interventions for challenging behaviour in children with intellectual disabilities: a systematic review and meta-analysis. *BMC Psychiatry*. 2015;15:303, doi:10.1186/s12888-015-0688-2
19. Fallah MS, Shaikh MR, Neupane B, Rusiecki D, Bennett TA, Beyene J. Atypical Antipsychotics for Irritability in Pediatric Autism: A Systematic Review and Network Meta-Analysis. *J Child Adolesc Psychopharmacol*. 2019;29(3):168-80, doi:10.1089/cap.2018.0115
20. Cheng-Shannon J, McGough JJ, Pataki C, McCracken JT. Second-generation antipsychotic medications in children and adolescents. *J Child Adolesc Psychopharmacol*. 2004;14(3):372-94, doi:10.1089/cap.2004.14.372
21. Simmonds M, Llewellyn A, Owen CG, Woolacott N. Predicting adult obesity from childhood obesity: a systematic review and meta-analysis. *Obes Rev*. 2016;17(2):95-107, doi:10.1111/obr.12334
22. Pisano S, Catone G, Veltri S, Lanzara V, Pozzi M, Clementi E, et al. Update on the safety of second generation antipsychotics in youths: a call for collaboration among paediatricians and child psychiatrists. *Ital J Pediatr*. 2016;42(1):51, doi:10.1186/s13052-016-0259-2
23. Eapen V. Evaluation of Weight Gain and Metabolic Parameters among Adolescent Psychiatric Inpatients: Role of Health Promotion and Life Style Intervention Programs. *Journal of Metabolic Syndrome*. 2012;01(03), doi:10.4172/2167-0943.1000109
24. Eapen V, Shiers D, Curtis J. Bridging the gap from evidence to policy and practice: reducing the progression to metabolic syndrome for children and adolescents on antipsychotic medication. *Aust N Z J Psychiatry*. 2013;47(5):435-42, doi:10.1177/0004867412463169
25. De Hert M, Dobbelaere M, Sheridan EM, Cohen D, Correll CU. Metabolic and endocrine adverse effects of second-generation antipsychotics in children and adolescents: A systematic review of randomized, placebo controlled trials and guidelines for clinical practice. *Eur Psychiatry*. 2011;26(3):144-58, doi:10.1016/j.eurpsy.2010.09.011

26. Correll CU. Assessing and maximizing the safety and tolerability of antipsychotics used in the treatment of children and adolescents. *J Clin Psychiatry*. 2008;69 Suppl 4:26-36
27. Stigler KA, Potenza MN, Posey DJ, McDougle CJ. Weight gain associated with atypical antipsychotic use in children and adolescents: prevalence, clinical relevance, and management. *Paediatr Drugs*. 2004;6(1):33-44, doi:10.2165/00148581-200406010-00003
28. Brown JT, Campo-Soria C, Bishop JR. Current strategies for predicting side effects from second generation antipsychotics in youth. *Expert Opinion on Drug Metabolism & Toxicology*. 2021;17(6):655-64, doi:10.1080/17425255.2021.1922668
29. Ratzoni G, Gothelf D, Brand-Gothelf A, Reidman J, Kikinzon L, Gal G, et al. Weight gain associated with olanzapine and risperidone in adolescent patients: a comparative prospective study. *J Am Acad Child Adolesc Psychiatry*. 2002;41(3):337-43, doi:10.1097/00004583-200203000-00014
30. Busner J, Targum SD. The clinical global impressions scale: applying a research tool in clinical practice. *Psychiatry (Edgmont)*. 2007;4(7):28-37
31. Karanges EA, Stephenson CP, McGregor IS. Longitudinal trends in the dispensing of psychotropic medications in Australia from 2009–2012: Focus on children, adolescents and prescriber specialty. *Australian & New Zealand Journal of Psychiatry*. 2014;48(10):917-31
32. Zito JM, Safer DJ, Berg LTW, Janhsen K, Fegert JM, Gardner JF, et al. A three-country comparison of psychotropic medication prevalence in youth. *Child and adolescent psychiatry and mental health*. 2008;2(1):1-8
33. Alessi-Severini S, Biscontri RG, Collins DM, Sareen J, Enns MW. Ten years of antipsychotic prescribing to children: a Canadian population-based study. *The Canadian Journal of Psychiatry*. 2012;57(1):52-8
34. Kaguelidou F, Holstiege J, Schink T, Bezemer I, Poluzzi E, Mazzaglia G, et al. 'Use of antipsychotics in children and adolescents: a picture from the ARITMO population-based European cohort study'. *Epidemiology and Psychiatric Sciences*. 2020;29:e117, doi:10.1017/S2045796020000293
35. McCoy SM, Jakicic JM, Gibbs BB. Comparison of Obesity, Physical Activity, and Sedentary Behaviors Between Adolescents With Autism Spectrum Disorders and Without. *Journal of Autism and Developmental Disorders*. 2016;46(7):2317-26, doi:10.1007/s10803-016-2762-0
36. Howard AL, Robinson M, Smith GJ, Ambrosini GL, Piek JP, Oddy WH. ADHD Is Associated With a "Western" Dietary Pattern in Adolescents. *Journal of Attention Disorders*. 2010;15(5):403-11, doi:10.1177/1087054710365990
37. Barnhill K, Gutierrez A, Ghossainy M, Mareliya Z, Devlin M, Sachdev P, et al. Dietary status and nutrient intake of children with autism spectrum disorder: A case-control study. *Research in Autism Spectrum Disorders*. 2018;50:51-9, doi:<https://doi.org/10.1016/j.rasd.2018.03.002>
38. Devnani PA, Hegde AU. Autism and sleep disorders. *J Pediatr Neurosci*. 2015;10(4):304-7, doi:10.4103/1817-1745.174438
39. Tiikkaja S, Tindberg Y. Poor school-related well-being among adolescents with disabilities or ADHD. *International journal of environmental research and public health*. 2021;19(1):8
40. Casseus M, Cooney JM, Wackowski OA. Tobacco use, dependence, and age of initiation among youths with cognitive disability. *The Journal of Pediatrics*. 2022;247:102-8
41. Mukherjee S, Skrede S, Milbank E, Andriantsitohaina R, López M, Fernø J. Understanding the Effects of Antipsychotics on Appetite Control. *Front Nutr*. 2021;8:815456, doi:10.3389/fnut.2021.815456
42. Ashton A, Jagannath A. Disrupted sleep and circadian rhythms in schizophrenia and their interaction with dopamine signaling. *Frontiers in neuroscience*. 2020;14:636

- 1
- 2
- 3
- 4 43. Matson JL, Neal D. Psychotropic medication use for challenging behaviors in persons
- 5 with intellectual disabilities: An overview. *Research in Developmental Disabilities*.
- 6 2009;30(3):572-86, doi:<https://doi.org/10.1016/j.ridd.2008.08.007>
- 7 44. Branford D, Gerrard D, Saleem N, Shaw C, Webster A. Stopping over-medication of
- 8 people with intellectual disability, autism or both (STOMP) in England part 1–history and
- 9 background of STOMP. *Advances in Mental Health and Intellectual Disabilities*.
- 10 2018;13(1):31-40
- 11 45. National Collaborating Centre for Mental H. Challenging behaviour and learning
- 12 disabilities: prevention and interventions for people with learning disabilities whose behaviour
- 13 challenges. 2015
- 14 46. Abbasi F, Blasey C, Reaven GM. Cardiometabolic risk factors and obesity: does it
- 15 matter whether BMI or waist circumference is the index of obesity? *Am J Clin Nutr*.
- 16 2013;98(3):637-40, doi:10.3945/ajcn.112.047506
- 17 47. Moher D, Shamseer L, Clarke M, Ghersi D, Liberati A, Petticrew M, et al. Preferred
- 18 reporting items for systematic review and meta-analysis protocols (PRISMA-P) 2015
- 19 statement. *Systematic Reviews*. 2015;4(1):1, doi:10.1186/2046-4053-4-1
- 20 48. Higgins JP, Thomas J, Chandler J, Cumpston M, Li T, Page MJ, et al. *Cochrane*
- 21 *handbook for systematic reviews of interventions*: John Wiley & Sons; 2019.
- 22 49. *Covidence systematic review software* Melbourne, Australia: Veritas Health
- 23 Innovation; [Available from: [www.covidence.org](http://www.covidence.org)].
- 24 50. Sterne JAC, Savović J, Page MJ, Elbers RG, Blencowe NS, Boutron I, et al. RoB 2: a
- 25 revised tool for assessing risk of bias in randomised trials. *BMJ*. 2019;366:l4898,
- 26 doi:10.1136/bmj.l4898
- 27 51. Andrade C. Mean Difference, Standardized Mean Difference (SMD), and Their Use in
- 28 Meta-Analysis: As Simple as It Gets. *J Clin Psychiatry*. 2020;81(5), doi:10.4088/JCP.20f13681
- 29 52. Team RC. A language and environment for statistical computing. R Foundation for
- 30 Statistical Computing Vienna, Austria.2021 [Available from: <https://www.R-project.org/>].
- 31 53. Guyatt GH, Oxman AD, Vist GE, Kunz R, Falck-Ytter Y, Alonso-Coello P, et al.
- 32 GRADE: an emerging consensus on rating quality of evidence and strength of
- 33 recommendations. *Bmj*. 2008;336(7650):924-6, doi:10.1136/bmj.39489.470347.AD
- 34
- 35
- 36
- 37
- 38
- 39
- 40
- 41
- 42
- 43
- 44
- 45
- 46
- 47
- 48
- 49
- 50
- 51
- 52
- 53
- 54
- 55
- 56
- 57
- 58
- 59
- 60

# Reporting checklist for protocol of a systematic review and meta analysis.

Based on the PRISMA-P guidelines.

## Instructions to authors

Complete this checklist by entering the page numbers from your manuscript where readers will find each of the items listed below.

Your article may not currently address all the items on the checklist. Please modify your text to include the missing information. If you are certain that an item does not apply, please write "n/a" and provide a short explanation.

Upload your completed checklist as an extra file when you submit to a journal.

In your methods section, say that you used the PRISMA-Reporting guidelines, and cite them as:

Moher D, Shamseer L, Clarke M, Ghersi D, Liberati A, Petticrew M, Shekelle P, Stewart LA. Preferred Reporting Items for Systematic Review and Meta-Analysis Protocols (PRISMA-P) 2015 statement. Syst Rev. 2015;4(1):1.

|                     |                     | Reporting Item                                                                                                                            | Page Number |
|---------------------|---------------------|-------------------------------------------------------------------------------------------------------------------------------------------|-------------|
| <b>Title</b>        |                     |                                                                                                                                           |             |
| Identification      | <a href="#">#1a</a> | Identify the report as a protocol of a systematic review                                                                                  | 1           |
| Update              | <a href="#">#1b</a> | If the protocol is for an update of a previous systematic review, identify as such                                                        | n/a         |
| <b>Registration</b> |                     |                                                                                                                                           |             |
|                     | <a href="#">#2</a>  | If registered, provide the name of the registry (such as PROSPERO) and registration number                                                | 4           |
| <b>Authors</b>      |                     |                                                                                                                                           |             |
| Contact             | <a href="#">#3a</a> | Provide name, institutional affiliation, e-mail address of all protocol authors; provide physical mailing address of corresponding author | 1           |

|    |                           |                     |                                                                                                                                                                                                                               |                                    |
|----|---------------------------|---------------------|-------------------------------------------------------------------------------------------------------------------------------------------------------------------------------------------------------------------------------|------------------------------------|
| 1  | Contribution              | <a href="#">#3b</a> | Describe contributions of protocol authors and identify the guarantor of the review                                                                                                                                           | 1 & 16                             |
| 2  |                           |                     |                                                                                                                                                                                                                               |                                    |
| 3  |                           |                     |                                                                                                                                                                                                                               |                                    |
| 4  |                           |                     |                                                                                                                                                                                                                               |                                    |
| 5  | <b>Amendments</b>         |                     |                                                                                                                                                                                                                               |                                    |
| 6  |                           |                     |                                                                                                                                                                                                                               |                                    |
| 7  |                           | <a href="#">#4</a>  | If the protocol represents an amendment of a previously completed or published protocol, identify as such and list changes; otherwise, state plan for documenting important protocol amendments                               | 2                                  |
| 8  |                           |                     |                                                                                                                                                                                                                               |                                    |
| 9  |                           |                     |                                                                                                                                                                                                                               |                                    |
| 10 |                           |                     |                                                                                                                                                                                                                               |                                    |
| 11 |                           |                     |                                                                                                                                                                                                                               |                                    |
| 12 |                           |                     |                                                                                                                                                                                                                               |                                    |
| 13 |                           |                     |                                                                                                                                                                                                                               |                                    |
| 14 | <b>Support</b>            |                     |                                                                                                                                                                                                                               |                                    |
| 15 |                           |                     |                                                                                                                                                                                                                               |                                    |
| 16 | Sources                   | <a href="#">#5a</a> | Indicate sources of financial or other support for the review                                                                                                                                                                 | 16                                 |
| 17 |                           |                     |                                                                                                                                                                                                                               |                                    |
| 18 |                           |                     |                                                                                                                                                                                                                               |                                    |
| 19 |                           |                     |                                                                                                                                                                                                                               |                                    |
| 20 | Sponsor                   | <a href="#">#5b</a> | Provide name for the review funder and / or sponsor                                                                                                                                                                           | 16                                 |
| 21 |                           |                     |                                                                                                                                                                                                                               |                                    |
| 22 | Role of sponsor or funder | <a href="#">#5c</a> | Describe roles of funder(s), sponsor(s), and / or institution(s), if any, in developing the protocol                                                                                                                          | 16                                 |
| 23 |                           |                     |                                                                                                                                                                                                                               |                                    |
| 24 |                           |                     |                                                                                                                                                                                                                               |                                    |
| 25 |                           |                     |                                                                                                                                                                                                                               |                                    |
| 26 | <b>Introduction</b>       |                     |                                                                                                                                                                                                                               |                                    |
| 27 |                           |                     |                                                                                                                                                                                                                               |                                    |
| 28 | Rationale                 | <a href="#">#6</a>  | Describe the rationale for the review in the context of what is already known                                                                                                                                                 | 4-6                                |
| 29 |                           |                     |                                                                                                                                                                                                                               |                                    |
| 30 |                           |                     |                                                                                                                                                                                                                               |                                    |
| 31 |                           |                     |                                                                                                                                                                                                                               |                                    |
| 32 | Objectives                | <a href="#">#7</a>  | Provide an explicit statement of the question(s) the review will address with reference to participants, interventions, comparators, and outcomes (PICO)                                                                      | 6-8                                |
| 33 |                           |                     |                                                                                                                                                                                                                               |                                    |
| 34 |                           |                     |                                                                                                                                                                                                                               |                                    |
| 35 |                           |                     |                                                                                                                                                                                                                               |                                    |
| 36 |                           |                     |                                                                                                                                                                                                                               |                                    |
| 37 |                           |                     |                                                                                                                                                                                                                               |                                    |
| 38 | <b>Methods</b>            |                     |                                                                                                                                                                                                                               |                                    |
| 39 |                           |                     |                                                                                                                                                                                                                               |                                    |
| 40 | Eligibility criteria      | <a href="#">#8</a>  | Specify the study characteristics (such as PICO, study design, setting, time frame) and report characteristics (such as years considered, language, publication status) to be used as criteria for eligibility for the review | 7-8                                |
| 41 |                           |                     |                                                                                                                                                                                                                               |                                    |
| 42 |                           |                     |                                                                                                                                                                                                                               |                                    |
| 43 |                           |                     |                                                                                                                                                                                                                               |                                    |
| 44 |                           |                     |                                                                                                                                                                                                                               |                                    |
| 45 |                           |                     |                                                                                                                                                                                                                               |                                    |
| 46 |                           |                     |                                                                                                                                                                                                                               |                                    |
| 47 | Information sources       | <a href="#">#9</a>  | Describe all intended information sources (such as electronic databases, contact with study authors, trial registers or other grey literature sources) with planned dates of coverage                                         | 8                                  |
| 48 |                           |                     |                                                                                                                                                                                                                               |                                    |
| 49 |                           |                     |                                                                                                                                                                                                                               |                                    |
| 50 |                           |                     |                                                                                                                                                                                                                               |                                    |
| 51 |                           |                     |                                                                                                                                                                                                                               |                                    |
| 52 |                           |                     |                                                                                                                                                                                                                               |                                    |
| 53 |                           |                     |                                                                                                                                                                                                                               |                                    |
| 54 | Search strategy           | <a href="#">#10</a> | Present draft of search strategy to be used for at least one electronic database, including planned limits, such that it could be repeated                                                                                    | n/a -<br>Provided in<br>Appendix 1 |
| 55 |                           |                     |                                                                                                                                                                                                                               |                                    |
| 56 |                           |                     |                                                                                                                                                                                                                               |                                    |
| 57 |                           |                     |                                                                                                                                                                                                                               |                                    |
| 58 |                           |                     |                                                                                                                                                                                                                               |                                    |
| 59 |                           |                     |                                                                                                                                                                                                                               |                                    |
| 60 |                           |                     |                                                                                                                                                                                                                               |                                    |

|    |                    |                      |                                                             |           |
|----|--------------------|----------------------|-------------------------------------------------------------|-----------|
| 1  | Study records -    | <a href="#">#11a</a> | Describe the mechanism(s) that will be used to manage       | 9-10      |
| 2  | data management    |                      | records and data throughout the review                      |           |
| 3  |                    |                      |                                                             |           |
| 4  | Study records -    | <a href="#">#11b</a> | State the process that will be used for selecting studies   | 9-10      |
| 5  | selection process  |                      | (such as two independent reviewers) through each            |           |
| 6  |                    |                      | phase of the review (that is, screening, eligibility and    |           |
| 7  |                    |                      | inclusion in meta-analysis)                                 |           |
| 8  |                    |                      |                                                             |           |
| 9  |                    |                      |                                                             |           |
| 10 |                    |                      |                                                             |           |
| 11 | Study records -    | <a href="#">#11c</a> | Describe planned method of extracting data from             | 9-10      |
| 12 | data collection    |                      | reports (such as piloting forms, done independently, in     |           |
| 13 | process            |                      | duplicate), any processes for obtaining and confirming      |           |
| 14 |                    |                      | data from investigators                                     |           |
| 15 |                    |                      |                                                             |           |
| 16 |                    |                      |                                                             |           |
| 17 |                    |                      |                                                             |           |
| 18 | Data items         | <a href="#">#12</a>  | List and define all variables for which data will be sought | 9-10      |
| 19 |                    |                      | (such as PICO items, funding sources), any pre-planned      |           |
| 20 |                    |                      | data assumptions and simplifications                        |           |
| 21 |                    |                      |                                                             |           |
| 22 |                    |                      |                                                             |           |
| 23 |                    |                      |                                                             |           |
| 24 | Outcomes and       | <a href="#">#13</a>  | List and define all outcomes for which data will be         | 6-8, 9-10 |
| 25 | prioritization     |                      | sought, including prioritization of main and additional     |           |
| 26 |                    |                      | outcomes, with rationale                                    |           |
| 27 |                    |                      |                                                             |           |
| 28 |                    |                      |                                                             |           |
| 29 | Risk of bias in    | <a href="#">#14</a>  | Describe anticipated methods for assessing risk of bias     | 10        |
| 30 | individual studies |                      | of individual studies, including whether this will be done  |           |
| 31 |                    |                      | at the outcome or study level, or both; state how this      |           |
| 32 |                    |                      | information will be used in data synthesis                  |           |
| 33 |                    |                      |                                                             |           |
| 34 |                    |                      |                                                             |           |
| 35 |                    |                      |                                                             |           |
| 36 | Data synthesis     | <a href="#">#15a</a> | Describe criteria under which study data will be            | 10-11     |
| 37 |                    |                      | quantitatively synthesised                                  |           |
| 38 |                    |                      |                                                             |           |
| 39 |                    |                      |                                                             |           |
| 40 | Data synthesis     | <a href="#">#15b</a> | If data are appropriate for quantitative synthesis,         | 10-11     |
| 41 |                    |                      | describe planned summary measures, methods of               |           |
| 42 |                    |                      | handling data and methods of combining data from            |           |
| 43 |                    |                      | studies, including any planned exploration of               |           |
| 44 |                    |                      | consistency (such as I <sup>2</sup> , Kendall's $\tau$ )    |           |
| 45 |                    |                      |                                                             |           |
| 46 |                    |                      |                                                             |           |
| 47 |                    |                      |                                                             |           |
| 48 | Data synthesis     | <a href="#">#15c</a> | Describe any proposed additional analyses (such as          | 10-11     |
| 49 |                    |                      | sensitivity or subgroup analyses, meta-regression)          |           |
| 50 |                    |                      |                                                             |           |
| 51 |                    |                      |                                                             |           |
| 52 | Data synthesis     | <a href="#">#15d</a> | If quantitative synthesis is not appropriate, describe the  | 10-11     |
| 53 |                    |                      | type of summary planned                                     |           |
| 54 |                    |                      |                                                             |           |
| 55 |                    |                      |                                                             |           |
| 56 | Meta-bias(es)      | <a href="#">#16</a>  | Specify any planned assessment of meta-bias(es) (such       | 12        |
| 57 |                    |                      | as publication bias across studies, selective reporting     |           |
| 58 |                    |                      | within studies)                                             |           |
| 59 |                    |                      |                                                             |           |
| 60 |                    |                      |                                                             |           |

1 Confidence in [#17](#) Describe how the strength of the body of evidence will 12-13  
2 cumulative  
3 be assessed (such as GRADE)  
4 evidence  
5

6 Notes:  
7

- 8  
9 • 10: n/a - Provided in Appendix 1 The PRISMA-P elaboration and explanation paper is distributed  
10 under the terms of the Creative Commons Attribution License CC-BY. This checklist was  
11 completed on 21. March 2023 using <https://www.goodreports.org/>, a tool made by the [EQUATOR](#)  
12 [Network](#) in collaboration with [Penelope.ai](#)  
13  
14  
15  
16  
17  
18  
19  
20  
21  
22  
23  
24  
25  
26  
27  
28  
29  
30  
31  
32  
33  
34  
35  
36  
37  
38  
39  
40  
41  
42  
43  
44  
45  
46  
47  
48  
49  
50  
51  
52  
53  
54  
55  
56  
57  
58  
59  
60

Appendix 2: Example Search Strategy for MEDLINE (via PubMed).

| Concept                                                                                               | PubMed                                                                                                                                                                                                                                                                                                                                                                                                                                                                                                                                                                                                                                                                                                                    | Central                                                                                                                                                                                                                                                                                                                             | Embase (Ovid)                                                                                                                                                                                                                                                                                                                                                             | PsycINFO (Ovid)                                                                                                                                                                                                                                                                                                                     |
|-------------------------------------------------------------------------------------------------------|---------------------------------------------------------------------------------------------------------------------------------------------------------------------------------------------------------------------------------------------------------------------------------------------------------------------------------------------------------------------------------------------------------------------------------------------------------------------------------------------------------------------------------------------------------------------------------------------------------------------------------------------------------------------------------------------------------------------------|-------------------------------------------------------------------------------------------------------------------------------------------------------------------------------------------------------------------------------------------------------------------------------------------------------------------------------------|---------------------------------------------------------------------------------------------------------------------------------------------------------------------------------------------------------------------------------------------------------------------------------------------------------------------------------------------------------------------------|-------------------------------------------------------------------------------------------------------------------------------------------------------------------------------------------------------------------------------------------------------------------------------------------------------------------------------------|
| Children and adolescents #1                                                                           | "Child"[MeSH Terms] OR "Adolescent"[MeSH Terms] OR "youth"[Text Word] OR "infant"[Text Word] OR "juvenile"[Text Word] OR "minor"[Text Word] OR "young person"[Text Word] OR "youngster"[Text Word] OR "kid"[Text Word] OR "kids"[Text Word] OR "child*"[Text Word] OR "adolesc*"[Text Word] OR "teen*"[Text Word]                                                                                                                                                                                                                                                                                                                                                                                                         | "youth" or "infant" or "juvenile" or "minor" or "young person" or "youngster" or "kid" or "kids" or "child*" or "adolesc*" or "teen*"                                                                                                                                                                                               | "youth" or "infant" or "juvenile" or "minor" or "young person" or "youngster" or "kid" or "kids" or "child*" or "adolesc*" or "teen*"                                                                                                                                                                                                                                     | "youth" or "infant" or "juvenile" or "minor" or "young person" or "youngster" or "kid" or "kids" or "child*" or "adolesc*" or "teen*"                                                                                                                                                                                               |
| Population (diagnosis of mental health illness likely to be prescribed antipsychotic medications). #2 | "Neurodevelopmental Disorders"[MeSH Terms:noexp] OR "Attention Deficit Disorder with Hyperactivity"[MeSH Terms] OR "Developmental Disabilities"[MeSH Terms] OR "Intellectual Disability"[MeSH Terms:noexp] OR "intellectual disabilit*"[Text Word] OR "intellectual impairment*"[Text Word] OR "intellectual delay*"[Text Word] OR "learning disabilit*"[Text Word] OR "learning impairment*"[Text Word] OR "developmental disabilit*"[Text Word] OR "developmental delay*"[Text Word] OR "autism*"[Text Word] OR "autistic*"[Text Word] OR "Kanners Syndrome"[Text Word] OR "neurodevelopmental*" OR "ADHD" OR "attention defici*" OR "schizophrenia, Pervasive"[Mesh] OR "schizophrenia, childhood"[MeSH Terms] OR "Tic | "intellectual disabilit*" or "intellectual impairment*" or "intellectual delay*" or "learning disabilit*" or "learning impairment*" or "developmental disabilit*" or "developmental delay*" or "autism*" or "autistic*" or "Kanners Syndrome" or "neurodevelopmental*" or "ADHD" or "attention defici*" or "pervasive developmental | "intellectual disabilit*" or "intellectual impairment*" or "intellectual delay*" or "learning disabilit*" or "learning impairment*" or "developmental delay*" or "autism*" or "autistic*" or "Kanners Syndrome" or "neurodevelopmental*" or "ADHD" or "attention defici*" or "schizophrenia" or "psychosis" or "tourette*" or "tic disorder" or "asperger*" or "bipolar*" | "intellectual disabilit*" or "intellectual impairment*" or "intellectual delay*" or "learning disabilit*" or "learning impairment*" or "developmental disabilit*" or "developmental delay*" or "autism*" or "autistic*" or "Kanners Syndrome" or "neurodevelopmental*" or "ADHD" or "attention defici*" or "pervasive developmental |

|                                                                         |                                                                                                                                                                                                                                                                                                                                                                                                                                                                                                                                                                                                    |                                                                                                                                                                                                 |                                                        |                                                                                                                                                                                                 |
|-------------------------------------------------------------------------|----------------------------------------------------------------------------------------------------------------------------------------------------------------------------------------------------------------------------------------------------------------------------------------------------------------------------------------------------------------------------------------------------------------------------------------------------------------------------------------------------------------------------------------------------------------------------------------------------|-------------------------------------------------------------------------------------------------------------------------------------------------------------------------------------------------|--------------------------------------------------------|-------------------------------------------------------------------------------------------------------------------------------------------------------------------------------------------------|
|                                                                         | Disorders"[MeSH Terms] OR<br>"autism*"[Text Word] OR<br>"autistic*"[Text Word] OR "Kanner's<br>Syndrome"[Text Word] OR<br>"neurodevelopmental*"[Text Word] OR<br>"ADHD"[Text Word] OR "attention<br>defici*"[Text Word] OR "pervasive<br>developmental disorder"[Text Word]<br>OR "developmental disabilit*"[Text<br>Word] OR "intellectual disabilit*"[Text<br>Word] OR "schizophrenia"[Text Word]<br>OR "psychosis"[Text Word] OR<br>"tourette*"[Text Word] OR "tic<br>disorder"[Text Word] OR<br>"asperger*"[Text Word] OR "Bipolar<br>and Related Disorders"[Mesh] OR<br>"bipolar*"[Text Word] | disorder" or<br>"developmental<br>disabilit*" or<br>"intellectual disabilit*" or<br>"schizophrenia" or<br>"psychosis" or<br>"tourette*" or "tic<br>disorder" or<br>"asperger*" or<br>"bipolar*" |                                                        | disorder" or<br>"developmental<br>disabilit*" or<br>"intellectual disabilit*" or<br>"schizophrenia" or<br>"psychosis" or<br>"tourette*" or "tic<br>disorder" or<br>"asperger*" or<br>"bipolar*" |
| Population<br>(people<br>taking<br>antipsychotic<br>medications).<br>#3 | "antipsychotic*"[Text Word] OR<br>"Antipsychotic Agents"[MeSH Terms]<br>OR "second generation<br>antipsychotic*"[Text Word]                                                                                                                                                                                                                                                                                                                                                                                                                                                                        | "antipsychotic*" or<br>"second generation<br>antipsychotic*"                                                                                                                                    | "antipsychotic*" or "second generation antipsychotic*" | "antipsychotic*" or<br>"second generation<br>antipsychotic*"                                                                                                                                    |
| #2 OR #3                                                                |                                                                                                                                                                                                                                                                                                                                                                                                                                                                                                                                                                                                    |                                                                                                                                                                                                 |                                                        |                                                                                                                                                                                                 |
| #1 AND #4                                                               |                                                                                                                                                                                                                                                                                                                                                                                                                                                                                                                                                                                                    |                                                                                                                                                                                                 |                                                        |                                                                                                                                                                                                 |

1  
2  
3  
4  
5  
6  
7  
8  
9  
10  
11  
12  
13  
14  
15  
16  
17  
18  
19  
20  
21  
22  
23  
24  
25  
26  
27  
28  
29  
30  
31  
32  
33  
34  
35  
36  
37  
38  
39  
40  
41  
42  
43  
44  
45  
46

|                                     |                                                                                                                                                                                                                                                                                                                                                                                                                                                                                                                                                                                                                                                                                                                                                                                                                                                                                   |                                                                                                                                                                                                                                                                                                                                                                                                                                                                                                                                                                                              |                                                                                                                                                                                                                                                                                                                                                                                                                                                                                                                               |                                                                                                                                                                                                                                                                                                                                                                                                                                                                                                                                                                                           |
|-------------------------------------|-----------------------------------------------------------------------------------------------------------------------------------------------------------------------------------------------------------------------------------------------------------------------------------------------------------------------------------------------------------------------------------------------------------------------------------------------------------------------------------------------------------------------------------------------------------------------------------------------------------------------------------------------------------------------------------------------------------------------------------------------------------------------------------------------------------------------------------------------------------------------------------|----------------------------------------------------------------------------------------------------------------------------------------------------------------------------------------------------------------------------------------------------------------------------------------------------------------------------------------------------------------------------------------------------------------------------------------------------------------------------------------------------------------------------------------------------------------------------------------------|-------------------------------------------------------------------------------------------------------------------------------------------------------------------------------------------------------------------------------------------------------------------------------------------------------------------------------------------------------------------------------------------------------------------------------------------------------------------------------------------------------------------------------|-------------------------------------------------------------------------------------------------------------------------------------------------------------------------------------------------------------------------------------------------------------------------------------------------------------------------------------------------------------------------------------------------------------------------------------------------------------------------------------------------------------------------------------------------------------------------------------------|
| Lifestyle intervention (general) #6 | "lifestyle intervention"[Text Word] OR<br>"healthy living"[Text Word] OR<br>"healthy lifestyle"[Text Word] OR<br>"lifestyle education"[Text Word] OR<br>"behavioral intervention"[Text Word]<br>OR "behavioural intervention"[Text<br>Word] OR "Behavior<br>Therapy"[Mesh:NoExp]OR<br>"behavioural change"[Text Word] OR<br>"behavioral change"[Text Word] OR<br>"behaviour change"[Text Word] OR<br>"behavior change"[Text Word] OR<br>"behaviour modification"[Text Word]<br>OR "behavior modification"[Text<br>Word] OR "behavioural<br>modification"[Text Word]<br>OR "behavioral modification"[Text<br>Word] OR "physical activity"[Text<br>Word] OR "dietary modification"[Text<br>Word] OR "nutrition therapy"[Text<br>Word] OR "physical therapy"[Text<br>Word] OR "nutrition intervention"[Text<br>Word] OR "Diet<br>Therapy"[Mesh:NoExp] OR "weight<br>loss"[Text Word] | "lifestyle intervention"<br>or "healthy living" or<br>"healthy lifestyle" or<br>"lifestyle education" or<br>"behavioral<br>intervention" or<br>"behavioural<br>intervention" or<br>"behavioural change"<br>or "behavioral change"<br>or "behaviour change"<br>or "behavior change"<br>or "behaviour<br>modification" or<br>"behavior<br>modification" or<br>"behavioural<br>modification" or<br>"behavioral<br>modification" or<br>"physical activity" or<br>"dietary modification"<br>or "nutrition therapy"<br>or "physical therapy"<br>or "nutrition<br>intervention" or<br>"weight loss" | "lifestyle intervention" or "healthy living" or "healthy lifestyle" or "lifestyle education" or<br>"behavioral intervention" or "behavioural intervention" or "behavioural change" or "behavioral<br>change" or "behaviour change" or "behavior change" or "behaviour modification" or "behavior<br>modification" or "behavioural modification" or "behavioral modification" or "physical activity" or<br>"dietary modification" or "nutrition therapy" or "physical therapy" or "nutrition intervention" or<br>"weight loss" | "lifestyle intervention"<br>or "healthy living" or<br>"healthy lifestyle" or<br>"lifestyle education" or<br>"behavioral<br>intervention" or<br>"behavioural<br>intervention" or<br>"behavioural change"<br>or "behavioral change"<br>or "behaviour change"<br>or "behavior change" or<br>"behaviour<br>modification" or<br>"behavior<br>modification" or<br>"behavioural<br>modification" or<br>"behavioral<br>modification" or<br>"physical activity" or<br>"dietary modification"<br>or "nutrition therapy"<br>or "physical therapy" or<br>"nutrition intervention"<br>or "weight loss" |
|-------------------------------------|-----------------------------------------------------------------------------------------------------------------------------------------------------------------------------------------------------------------------------------------------------------------------------------------------------------------------------------------------------------------------------------------------------------------------------------------------------------------------------------------------------------------------------------------------------------------------------------------------------------------------------------------------------------------------------------------------------------------------------------------------------------------------------------------------------------------------------------------------------------------------------------|----------------------------------------------------------------------------------------------------------------------------------------------------------------------------------------------------------------------------------------------------------------------------------------------------------------------------------------------------------------------------------------------------------------------------------------------------------------------------------------------------------------------------------------------------------------------------------------------|-------------------------------------------------------------------------------------------------------------------------------------------------------------------------------------------------------------------------------------------------------------------------------------------------------------------------------------------------------------------------------------------------------------------------------------------------------------------------------------------------------------------------------|-------------------------------------------------------------------------------------------------------------------------------------------------------------------------------------------------------------------------------------------------------------------------------------------------------------------------------------------------------------------------------------------------------------------------------------------------------------------------------------------------------------------------------------------------------------------------------------------|

|                                                                                                                                                                                                                                                                         |                                                                                                                                                                                                                                                                                                                             |                                                                                                                                                                                                                                                                                                                                                                                                                                                                                                                                                                                                                                                                                                                                                                                                                                                                                                                                                                                                                                                                                                                                                                                                                                                                                                                                                                                                                                                                                                                                                                                                                                                                                                                                                                                                                                                                                                                                                                                |                                                          |
|-------------------------------------------------------------------------------------------------------------------------------------------------------------------------------------------------------------------------------------------------------------------------|-----------------------------------------------------------------------------------------------------------------------------------------------------------------------------------------------------------------------------------------------------------------------------------------------------------------------------|--------------------------------------------------------------------------------------------------------------------------------------------------------------------------------------------------------------------------------------------------------------------------------------------------------------------------------------------------------------------------------------------------------------------------------------------------------------------------------------------------------------------------------------------------------------------------------------------------------------------------------------------------------------------------------------------------------------------------------------------------------------------------------------------------------------------------------------------------------------------------------------------------------------------------------------------------------------------------------------------------------------------------------------------------------------------------------------------------------------------------------------------------------------------------------------------------------------------------------------------------------------------------------------------------------------------------------------------------------------------------------------------------------------------------------------------------------------------------------------------------------------------------------------------------------------------------------------------------------------------------------------------------------------------------------------------------------------------------------------------------------------------------------------------------------------------------------------------------------------------------------------------------------------------------------------------------------------------------------|----------------------------------------------------------|
| <p>1<br/>2<br/>3<br/>4<br/>5<br/>6<br/>7<br/>8<br/>9<br/>10<br/>11<br/>12<br/>13<br/>14<br/>15<br/>16<br/>17<br/>18<br/>19<br/>20<br/>21<br/>22<br/>23<br/>24<br/>25</p> <p>Randomised controlled trial (Cochrane sensitivity and specificity maximising filter) #7</p> | <p>("randomized controlled trial"[Publication Type] OR "controlled clinical trial"[Publication Type] OR "randomized"[Title/Abstract] OR "placebo"[Title/Abstract] OR "clinical trials as topic"[MeSH Terms:noexp] OR "randomly"[Title/Abstract] OR "trial"[Title]) NOT ("animals"[MeSH Terms] NOT "humans"[MeSH Terms])</p> | <p>(Randomized controlled trial/ or Controlled clinical study/ or random\$.ti.ab. or randomization/ or intermethod comparison/ or placebo.ti.ab. or (compare or compared or comparison).ti. or ((evaluated or evaluate or evaluating or assessed or assess) and (compare or compared or comparing or comparison)).ab. or (open adj label).ti.ab. or ((double or single or doubly or singly) adj (blind or blinded or blindly)).ti.ab. or double blind procedure/ or parallel group\$1.ti.ab. or (crossover or cross over).ti.ab. or ((assign\$ or match or matched or allocation) adj5 (alternate or group\$1 or intervention\$1 or patient\$1 or subject\$1 or participant\$1)).ti.ab. or (assigned or allocated).ti.ab. or (controlled adj7 (study or design or trial)).ti.ab. or (volunteer or volunteers).ti.ab. or human experiment/ or trial.ti.) not (((random\$ adj sampl\$ adj7 ("cross section\$" or questionnaire\$1 or survey\$ or database\$1)).ti.ab. not (comparative study/ or controlled study/ or randomi?ed controlled.ti.ab. or randomly assigned.ti.ab.)) or (Cross-sectional study/ not (randomized controlled trial/ or controlled clinical study/ or controlled study/ or randomi?ed controlled.ti.ab. or control group\$1.ti.ab.)) or (((case adj control\$) and random\$) not randomi?ed controlled).ti.ab. or (Systematic review not (trial or study)).ti. or (nonrandom\$ not random\$).ti.ab. or "Random field\$.ti.ab. or (random cluster adj3 sampl\$).ti.ab. or ((review.ab. and review.pt.) not trial.ti.) or ("we searched".ab. and (review.ti. or review.pt.)) or "update review".ab. or (databases adj4 searched).ab. or ((rat or rats or mouse or mice or swine or porcine or murine or sheep or lambs or pigs or piglets or rabbit or rabbits or cat or cats or dog or dogs or cattle or bovine or monkey or monkeys or trout or marmoset\$1).ti. and animal experiment/) or (Animal experiment/ not (human experiment/ or human/)))</p> | <p>(double-blind or random: assigned or control).tw.</p> |
| <p>26<br/>27<br/>28<br/>29<br/>30<br/>31<br/>32<br/>33<br/>34<br/>35<br/>36<br/>37<br/>38<br/>39<br/>40<br/>41<br/>42<br/>43<br/>44<br/>45<br/>46</p> <p>#5 and #6 and #7</p>                                                                                           |                                                                                                                                                                                                                                                                                                                             |                                                                                                                                                                                                                                                                                                                                                                                                                                                                                                                                                                                                                                                                                                                                                                                                                                                                                                                                                                                                                                                                                                                                                                                                                                                                                                                                                                                                                                                                                                                                                                                                                                                                                                                                                                                                                                                                                                                                                                                |                                                          |
