# Supplementary material for: Effectiveness of lifestyle interventions for improving the physical health of children and adolescents taking antipsychotic medications: protocol for a systematic review and meta-analysis
Source: PubMed Central journal article supplement — BMJ Open. 2023 Oct 27;13(10):e073893. doi: 10.1136/bmjopen-2023-073893 (PMC10619077; doi:10.1136/bmjopen-2023-073893), 2023-10-27
Supplement: bmjopen-2023-073893supp001.pdf [file bmjopen-2023-073893supp001.pdf]

## Appendix 2: Example Search Strategy for MEDLINE (via PubMed).

| Concept                                                                                                                       | PubMed                                                                                                                                                                                                                                                                                                                                                                                                                                                                                                                                                                                                                                                                       | Central                                                                                                                                                                                                                                                                                                                                                                                                    | Embase (Ovid)                                                                                                                                                                                                                                                                                                                                                                                                                                                                                                                               | PsycINFO (Ovid)                                                                                                                                                                                                                                                                                                                                                                                         |
|-------------------------------------------------------------------------------------------------------------------------------|------------------------------------------------------------------------------------------------------------------------------------------------------------------------------------------------------------------------------------------------------------------------------------------------------------------------------------------------------------------------------------------------------------------------------------------------------------------------------------------------------------------------------------------------------------------------------------------------------------------------------------------------------------------------------|------------------------------------------------------------------------------------------------------------------------------------------------------------------------------------------------------------------------------------------------------------------------------------------------------------------------------------------------------------------------------------------------------------|---------------------------------------------------------------------------------------------------------------------------------------------------------------------------------------------------------------------------------------------------------------------------------------------------------------------------------------------------------------------------------------------------------------------------------------------------------------------------------------------------------------------------------------------|---------------------------------------------------------------------------------------------------------------------------------------------------------------------------------------------------------------------------------------------------------------------------------------------------------------------------------------------------------------------------------------------------------|
| Children and adolescents<br>#1                                                                                                | "Child"[MeSH Terms] OR<br>"Adolescent"[MeSH Terms] OR<br>"youth"[Text Word] OR "infant"[Text<br>Word] OR "juvenile"[Text Word] OR<br>"minor"[Text Word] OR "young<br>person"[Text Word] OR<br>"youngster"[Text Word] OR "kid"[Text<br>Word] OR "kids"[Text Word] OR<br>"child*"[Text Word] OR<br>"adolesc*"[Text Word] OR<br>"teen*"[Text Word]                                                                                                                                                                                                                                                                                                                              | "youth" or "infant" or<br>"juvenile" or "minor"<br>or "young person" or<br>"youngster" or "kid" or<br>"kids" or "child*" or<br>"adolesc* or teen*"                                                                                                                                                                                                                                                         | "youth" or "infant" or "juvenile" or "minor" or "young person" or "youngster" or "kid" or "kids" or<br>"child*" or "adolesc* or teen*"                                                                                                                                                                                                                                                                                                                                                                                                      | "youth" or "infant" or<br>"juvenile" or "minor" or<br>"young person" or<br>"youngster" or "kid" or<br>"kids" or "child*" or<br>"adolesc* or teen*"                                                                                                                                                                                                                                                      |
| Population<br>(diagnosis of<br>mental health<br>illness likely<br>to be<br>prescribed<br>antipsychotic<br>medications).<br>#2 | "Neurodevelopmental Disorders"[MeSH<br>Terms:noexp] OR "Attention Deficit<br>Disorder with Hyperactivity"[MeSH<br>Terms] OR "Developmental<br>Disabilities"[MeSH Terms] OR<br>"Intellectual Disability"[MeSH<br>Terms:noexp] OR "intellectual<br>disabilit*"[Text Word] OR "intellectual<br>impairment*"[Text Word] OR<br>"intellectual delay*"[Text Word] OR<br>"learning disabilit*"[Text Word] OR<br>"learning impairment*"[Text Word] OR<br>"learning delay*"[Text Word] OR<br>"developmental disabilit*"[Text Word]<br>OR "developmental delay"[Text Word]<br>OR "Child Development Disorders,<br>Pervasive"[Mesh] OR "schizophrenia,<br>childhood"[MeSH Terms] OR "Tic | "intellectual disabilit*"<br>or "intellectual<br>impairment*" or<br>"intellectual delay*" or<br>"learning disabilit*" or<br>"learning impairment*" or<br>"learning delay*" or<br>"developmental<br>disabilit*" or<br>"developmental delay"<br>or "autism*" or<br>"autistic*" or "Kanners<br>Syndrome" or<br>"neurodevelopmental*" or<br>"ADHD" or<br>"attention defici*" or<br>"pervasive<br>developmental | "intellectual disabilit*" or "intellectual impairment*" or "intellectual delay*" or "learning<br>disabilit*" or "learning impairment*" or "learning delay*" or "developmental disabilit*" or<br>"developmental delay" or "autism*" or "autistic*" or "Kanners Syndrome" or<br>"neurodevelopmental*" or "ADHD" or "attention defici*" or "pervasive developmental disorder"<br>or "developmental disabilit*" or "intellectual disabilit*" or "schizophrenia" or "psychosis" or<br>"tourette*" or "tic disorder" or "asperger*" or "bipolar*" | "intellectual disabilit*" or "intellectual<br>impairment*" or<br>"intellectual delay*" or<br>"learning disabilit*" or<br>"learning impairment*" or<br>"learning delay*" or<br>"developmental<br>disabilit*" or<br>"developmental delay"<br>or "autism*" or<br>"autistic*" or "Kanners<br>Syndrome" or<br>"neurodevelopmental*" or<br>"ADHD" or<br>"attention defici*" or<br>"pervasive<br>developmental |

|                                                                         |                                                                                                                                                                                                                                                                                                                                                                                                                                                                                                                                                                                                    |                                                                                                                                                                                                 |                                                        |                                                                                                                                                                                                 |
|-------------------------------------------------------------------------|----------------------------------------------------------------------------------------------------------------------------------------------------------------------------------------------------------------------------------------------------------------------------------------------------------------------------------------------------------------------------------------------------------------------------------------------------------------------------------------------------------------------------------------------------------------------------------------------------|-------------------------------------------------------------------------------------------------------------------------------------------------------------------------------------------------|--------------------------------------------------------|-------------------------------------------------------------------------------------------------------------------------------------------------------------------------------------------------|
|                                                                         | Disorders"[MeSH Terms] OR<br>"autism*"[Text Word] OR<br>"autistic*"[Text Word] OR "Kanner's<br>Syndrome"[Text Word] OR<br>"neurodevelopmental*"[Text Word] OR<br>"ADHD"[Text Word] OR "attention<br>defici*"[Text Word] OR "pervasive<br>developmental disorder"[Text Word]<br>OR "developmental disabilit*"[Text<br>Word] OR "intellectual disabilit*"[Text<br>Word] OR "schizophrenia"[Text Word]<br>OR "psychosis"[Text Word] OR<br>"tourette*"[Text Word] OR "tic<br>disorder"[Text Word] OR<br>"asperger*"[Text Word] OR "Bipolar<br>and Related Disorders"[Mesh] OR<br>"bipolar*"[Text Word] | disorder" or<br>"developmental<br>disabilit*" or<br>"intellectual disabilit*"<br>or "schizophrenia" or<br>"psychosis" or<br>"tourette*" or "tic<br>disorder" or<br>"asperger*" or<br>"bipolar*" |                                                        | disorder" or<br>"developmental<br>disabilit*" or<br>"intellectual disabilit*"<br>or "schizophrenia" or<br>"psychosis" or<br>"tourette*" or "tic<br>disorder" or<br>"asperger*" or<br>"bipolar*" |
| Population<br>(people<br>taking<br>antipsychotic<br>medications).<br>#3 | "antipsychotic*"[Text Word] OR<br>"Antipsychotic Agents"[MeSH Terms]<br>OR "second generation<br>antipsychotic*"[Text Word]                                                                                                                                                                                                                                                                                                                                                                                                                                                                        | "antipsychotic*" or<br>"second generation<br>antipsychotic*"                                                                                                                                    | "antipsychotic*" or "second generation antipsychotic*" | "antipsychotic*" or<br>"second generation<br>antipsychotic*"                                                                                                                                    |
| #2 OR #3                                                                |                                                                                                                                                                                                                                                                                                                                                                                                                                                                                                                                                                                                    |                                                                                                                                                                                                 |                                                        |                                                                                                                                                                                                 |
| #1 AND #4                                                               |                                                                                                                                                                                                                                                                                                                                                                                                                                                                                                                                                                                                    |                                                                                                                                                                                                 |                                                        |                                                                                                                                                                                                 |

|                                     |                                                                                                                                                                                                                                                                                                                                                                                                                                                                                                                                                                                                                                                                                                                                                                                                                                                                             |                                                                                                                                                                                                                                                                                                                                                                                                                                                                                                                       |                                                                                                                                                                                                                                                                                                                                                                                                                                                            |                                                                                                                                                                                                                                                                                                                                                                                                                                                                                                                       |
|-------------------------------------|-----------------------------------------------------------------------------------------------------------------------------------------------------------------------------------------------------------------------------------------------------------------------------------------------------------------------------------------------------------------------------------------------------------------------------------------------------------------------------------------------------------------------------------------------------------------------------------------------------------------------------------------------------------------------------------------------------------------------------------------------------------------------------------------------------------------------------------------------------------------------------|-----------------------------------------------------------------------------------------------------------------------------------------------------------------------------------------------------------------------------------------------------------------------------------------------------------------------------------------------------------------------------------------------------------------------------------------------------------------------------------------------------------------------|------------------------------------------------------------------------------------------------------------------------------------------------------------------------------------------------------------------------------------------------------------------------------------------------------------------------------------------------------------------------------------------------------------------------------------------------------------|-----------------------------------------------------------------------------------------------------------------------------------------------------------------------------------------------------------------------------------------------------------------------------------------------------------------------------------------------------------------------------------------------------------------------------------------------------------------------------------------------------------------------|
| Lifestyle intervention (general) #6 | <p>"lifestyle intervention"[Text Word] OR<br/> "healthy living"[Text Word] OR<br/> "healthy lifestyle"[Text Word] OR<br/> "lifestyle education"[Text Word] OR<br/> "behavioral intervention"[Text Word]<br/> OR "behavioural intervention"[Text Word] OR "Behavior Therapy"[Mesh:NoExp]OR<br/> "behavioural change"[Text Word] OR<br/> "behavioral change"[Text Word] OR<br/> "behaviour change"[Text Word] OR<br/> "behavior change"[Text Word] OR<br/> "behaviour modification"[Text Word]<br/> OR "behavior modification"[Text Word] OR "behavioural modification"[Text Word]<br/> OR"behavioral modification"[Text Word] OR "physical activity"[Text Word] OR "dietary modification"[Text Word] OR "nutrition therapy"[Text Word] OR "physical therapy"[Text Word] OR "nutrition intervention"[Text Word] OR "Diet Therapy"[Mesh:NoExp] OR "weight loss"[Text Word]</p> | <p>"lifestyle intervention" or "healthy living" or "healthy lifestyle" or "lifestyle education" or "behavioral intervention" or "behavioural intervention" or "behavioural change" or "behavioral change" or "behaviour change" or "behavior change" or "behaviour modification" or "behavior modification" or "behavioural modification" or "behavioral modification" or "physical activity" or "dietary modification" or "nutrition therapy" or "physical therapy" or "nutrition intervention" or "weight loss"</p> | <p>"lifestyle intervention" or "healthy living" or "healthy lifestyle" or "lifestyle education" or "behavioral intervention" or "behavioural intervention" or "behavioural change" or "behavioral change" or "behaviour change" or "behavior change" or "behaviour modification" or "behavior modification" or "physical activity" or "dietary modification" or "nutrition therapy" or "physical therapy" or "nutrition intervention" or "weight loss"</p> | <p>"lifestyle intervention" or "healthy living" or "healthy lifestyle" or "lifestyle education" or "behavioral intervention" or "behavioural intervention" or "behavioural change" or "behavioral change" or "behaviour change" or "behavior change" or "behaviour modification" or "behavior modification" or "behavioural modification" or "behavioral modification" or "physical activity" or "dietary modification" or "nutrition therapy" or "physical therapy" or "nutrition intervention" or "weight loss"</p> |
|-------------------------------------|-----------------------------------------------------------------------------------------------------------------------------------------------------------------------------------------------------------------------------------------------------------------------------------------------------------------------------------------------------------------------------------------------------------------------------------------------------------------------------------------------------------------------------------------------------------------------------------------------------------------------------------------------------------------------------------------------------------------------------------------------------------------------------------------------------------------------------------------------------------------------------|-----------------------------------------------------------------------------------------------------------------------------------------------------------------------------------------------------------------------------------------------------------------------------------------------------------------------------------------------------------------------------------------------------------------------------------------------------------------------------------------------------------------------|------------------------------------------------------------------------------------------------------------------------------------------------------------------------------------------------------------------------------------------------------------------------------------------------------------------------------------------------------------------------------------------------------------------------------------------------------------|-----------------------------------------------------------------------------------------------------------------------------------------------------------------------------------------------------------------------------------------------------------------------------------------------------------------------------------------------------------------------------------------------------------------------------------------------------------------------------------------------------------------------|

|                                                                                         |                                                                                                                                                                                                                                                                                                                     |  |                                                                                                                                                                                                                                                                                                                                                                                                                                                                                                                                                                                                                                                                                                                                                                                                                                                                                                                                                                                                                                                                                                                                                                                                                                                                                                                                                                                                                                                                                                                                                                                                                                                                                                                                                                                                                                                                                                                                                                          |                                                   |
|-----------------------------------------------------------------------------------------|---------------------------------------------------------------------------------------------------------------------------------------------------------------------------------------------------------------------------------------------------------------------------------------------------------------------|--|--------------------------------------------------------------------------------------------------------------------------------------------------------------------------------------------------------------------------------------------------------------------------------------------------------------------------------------------------------------------------------------------------------------------------------------------------------------------------------------------------------------------------------------------------------------------------------------------------------------------------------------------------------------------------------------------------------------------------------------------------------------------------------------------------------------------------------------------------------------------------------------------------------------------------------------------------------------------------------------------------------------------------------------------------------------------------------------------------------------------------------------------------------------------------------------------------------------------------------------------------------------------------------------------------------------------------------------------------------------------------------------------------------------------------------------------------------------------------------------------------------------------------------------------------------------------------------------------------------------------------------------------------------------------------------------------------------------------------------------------------------------------------------------------------------------------------------------------------------------------------------------------------------------------------------------------------------------------------|---------------------------------------------------|
| Randomised controlled trial (Cochrane sensitivity and specificity maximising filter) #7 | ("randomized controlled trial"[Publication Type] OR "controlled clinical trial"[Publication Type] OR "randomized"[Title/Abstract] OR "placebo"[Title/Abstract] OR "clinical trials as topic"[MeSH Terms:noexp] OR "randomly"[Title/Abstract] OR "trial"[Title] NOT ("animals"[MeSH Terms] NOT "humans"[MeSH Terms]) |  | (Randomized controlled trial/ or Controlled clinical study/ or random\$.ti,ab. or randomization/ or intermethod comparison/ or placebo.ti,ab. or (compare or compared or comparison).ti. or ((evaluated or evaluate or evaluating or assessed or assess) and (compare or compared or comparing or comparison)).ab. or (open adj label).ti,ab. or ((double or single or doubly or singly) adj (blind or blinded or blindly)).ti,ab. or double blind procedure/ or parallel group\$1.ti,ab. or (crossover or cross over).ti,ab. or ((assign\$ or match or matched or allocation) adj5 (alternate or group\$1 or intervention\$1 or patient\$1 or subject\$1 or participant\$1)).ti,ab. or (assigned or allocated).ti,ab. or (controlled adj7 (study or design or trial)).ti,ab. or (volunteer or volunteers).ti,ab. or human experiment/ or trial.ti.) not (((random\$ adj sampl\$ adj7 ("cross section\$" or questionnaire\$1 or survey\$ or database\$1)).ti,ab. not (comparative study/ or controlled study/ or randomi?ed controlled.ti,ab. or randomly assigned.ti,ab.)) or (Cross-sectional study/ not (randomized controlled trial/ or controlled clinical study/ or controlled study/ or randomi?ed controlled.ti,ab. or control group\$1.ti,ab.)) or (((case adj control\$) and random\$) not randomi?ed controlled).ti,ab. or (Systematic review not (trial or study)).ti. or (nonrandom\$ not random\$).ti,ab. or "Random field\$".ti,ab. or (random cluster adj3 sampl\$).ti,ab. or ((review.ab. and review.pt.) not trial.ti.) or ("we searched".ab. and (review.ti. or review.pt.)) or "update review".ab. or (databases adj4 searched).ab. or ((rat or rats or mouse or mice or swine or porcine or murine or sheep or lambs or pigs or piglets or rabbit or rabbits or cat or cats or dog or dogs or cattle or bovine or monkey or monkeys or trout or marmoset\$1).ti. and animal experiment/) or (Animal experiment/ not (human experiment/ or human/))) | (double-blind or random: assigned or control).tw. |
| #5 and #6 and #7                                                                        |                                                                                                                                                                                                                                                                                                                     |  |                                                                                                                                                                                                                                                                                                                                                                                                                                                                                                                                                                                                                                                                                                                                                                                                                                                                                                                                                                                                                                                                                                                                                                                                                                                                                                                                                                                                                                                                                                                                                                                                                                                                                                                                                                                                                                                                                                                                                                          |                                                   |
